# Supplementary material for: Synthesis, Characterization and Biological Evaluation of Benzothiazole–Isoquinoline Derivative
Source: MDPI journal article supplement (doi:10.3390/molecules27249062), 2022-12-19
Supplement: s1 [file s1]

## Supplementary Materials

### Synthesis and Biological Activity Evaluation of Benzothiazole-isoquinoline Derivatives

Wei-Hua Liu<sup>1,†</sup>, Zhi-Wen He<sup>1,†</sup>, Dong-Hai Zhao<sup>2</sup>, Yi-Ming Hu<sup>1</sup>, Yu-Xia Zhu<sup>1</sup>, Ling-Jian Zhang<sup>1</sup>, Lian-Hai Jin<sup>2</sup>, Li-Ping Guan<sup>1,\*</sup>, Si-Hong Wang<sup>3,\*</sup>

<sup>1</sup> Food and Pharmacy College, Zhejiang Ocean University, Zhejiang, Zhoushan 316022, P. R. China

<sup>2</sup> Pharmacy College, Jilin Medical University, Jilin, Jilin 132013, P. R. China

<sup>3</sup> Key Laboratory of Natural Resource of the Changbai Mountain and Functional Molecules, Ministry of Education, Yanbian University, Jilin, Yanji 133000, P. R. China

<sup>†</sup> These authors contributed equally to this work.

\* Corresponding author.

E-mail address: glp730@163.com (L.P. Guan); shwang@ybu.edu.cn (S.-H. Wang).

## Table of Content

1. AO Fluorescent Staining Analysis Derivatives (**4b-4d, 4f,4j,4i**)
2. HPLC Data of Derivatives (**4a-4p**)
3. NMR Data of Derivatives (**4a-4p**)

1. AO Fluorescent Staining Analysis of Derivatives (**4b-4d**, **4f,4j,4i**)

10X

20X

control:

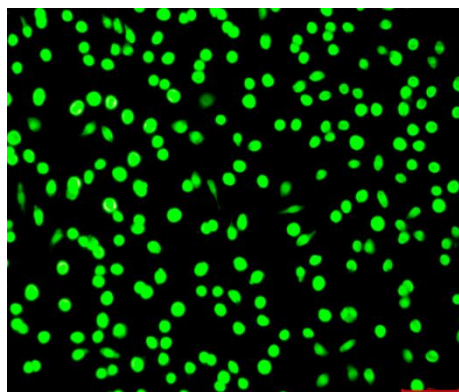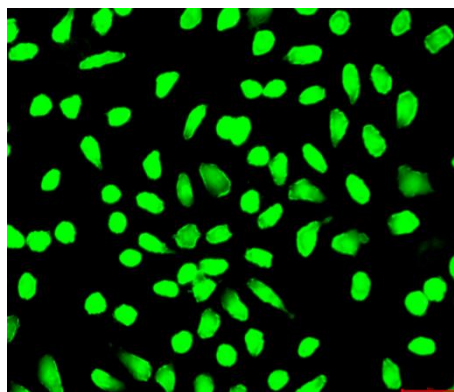

**4b:**

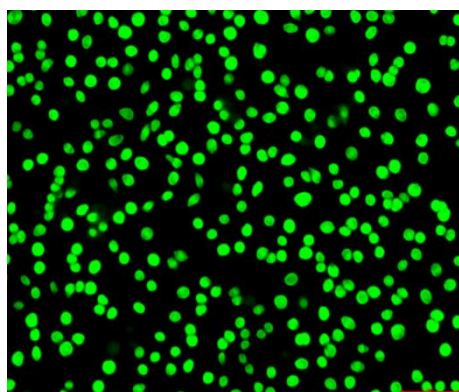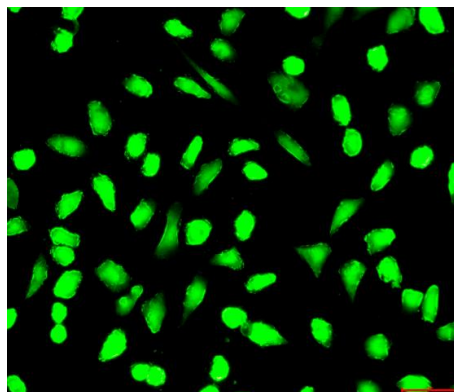

**4c:**

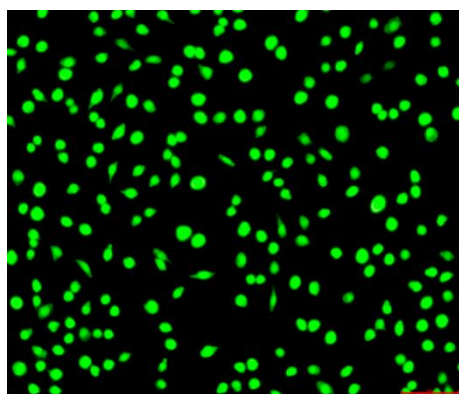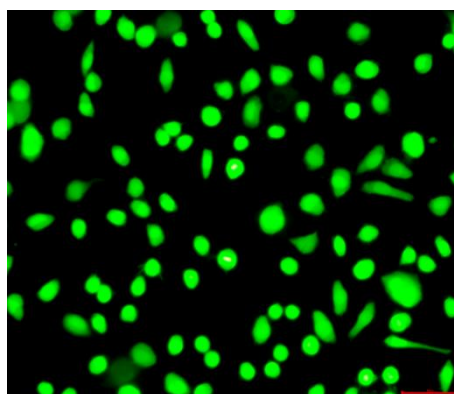

**4d:**

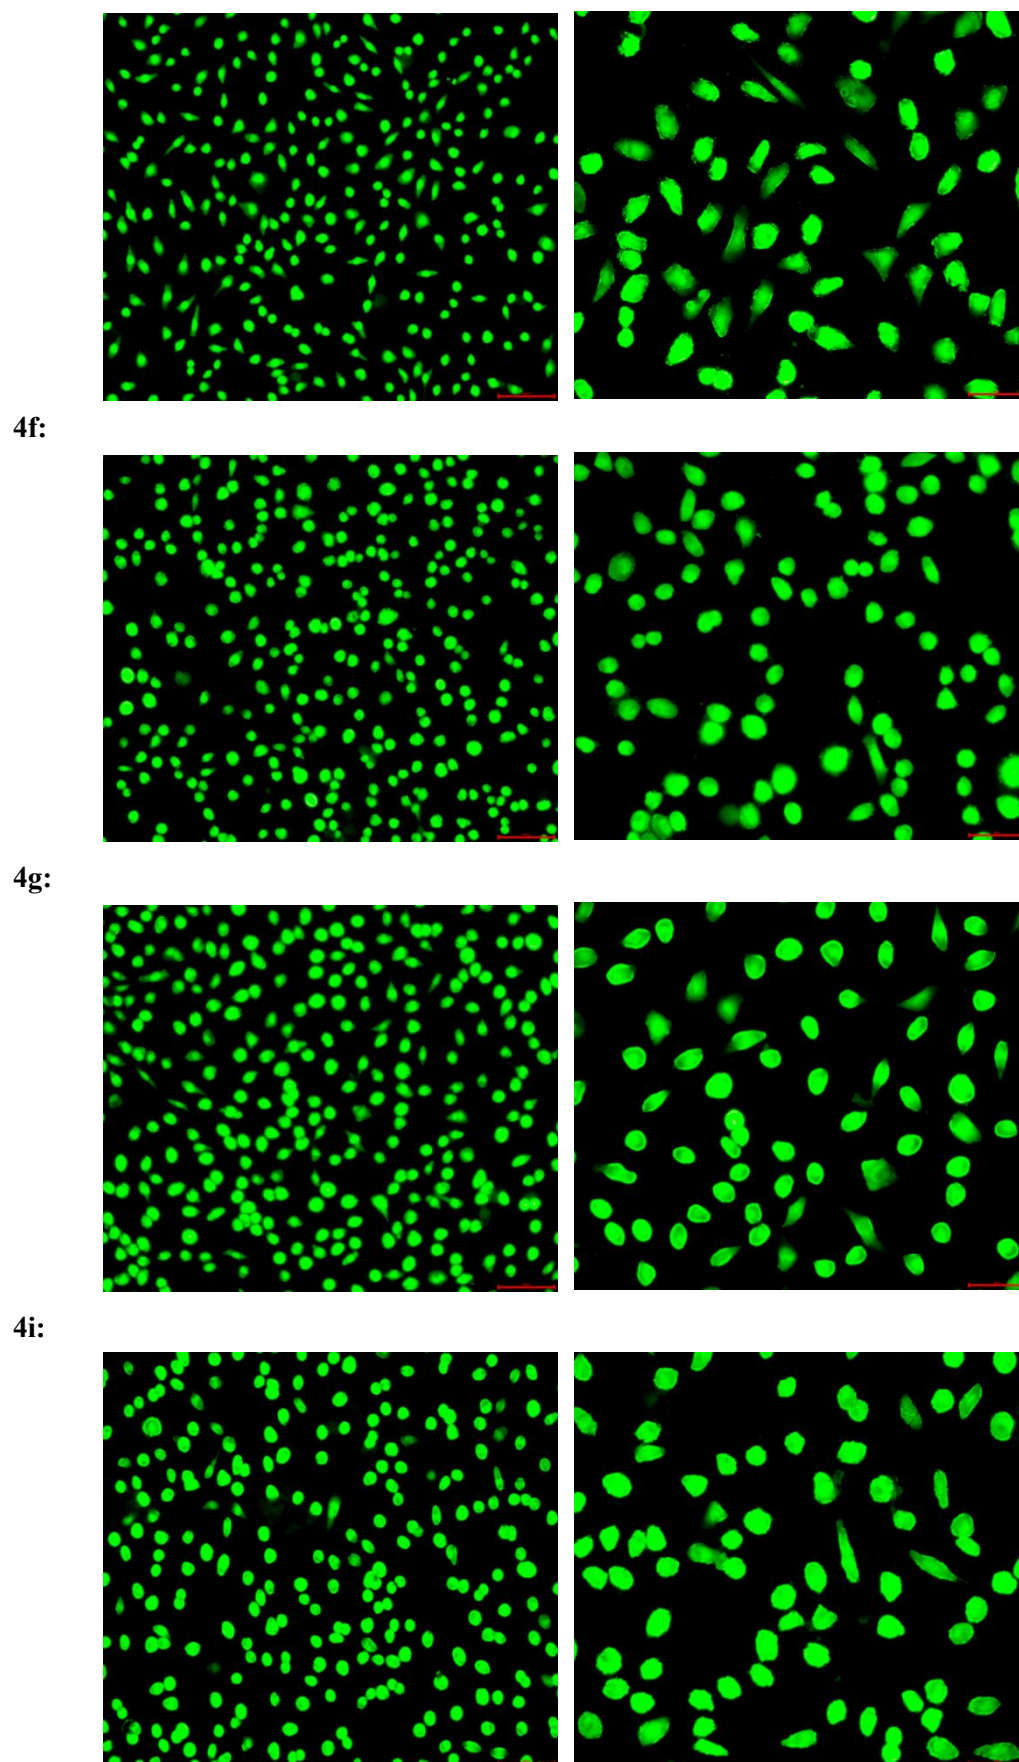

*Figure S1. The effect of benzothiazole-isoquinoline derivatives (4b-4d, 4f, 4g, 4i) on the proliferation of L929 cells*

## 2. HPLC Data of Derivatives (**4a-4p**)

**4a:**

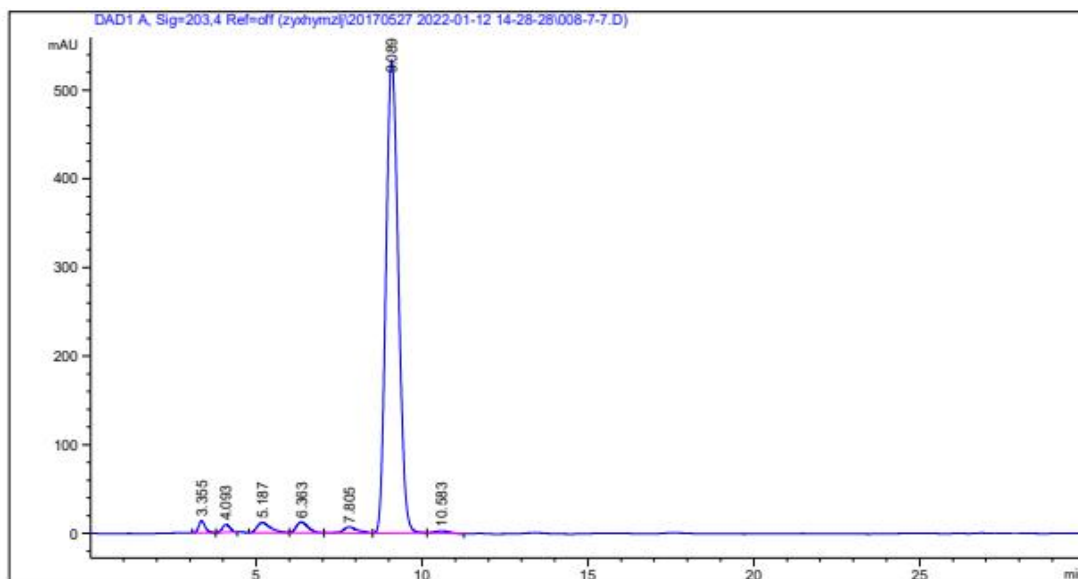

*Figure S2. The HPLC data of 4a*

**4b**

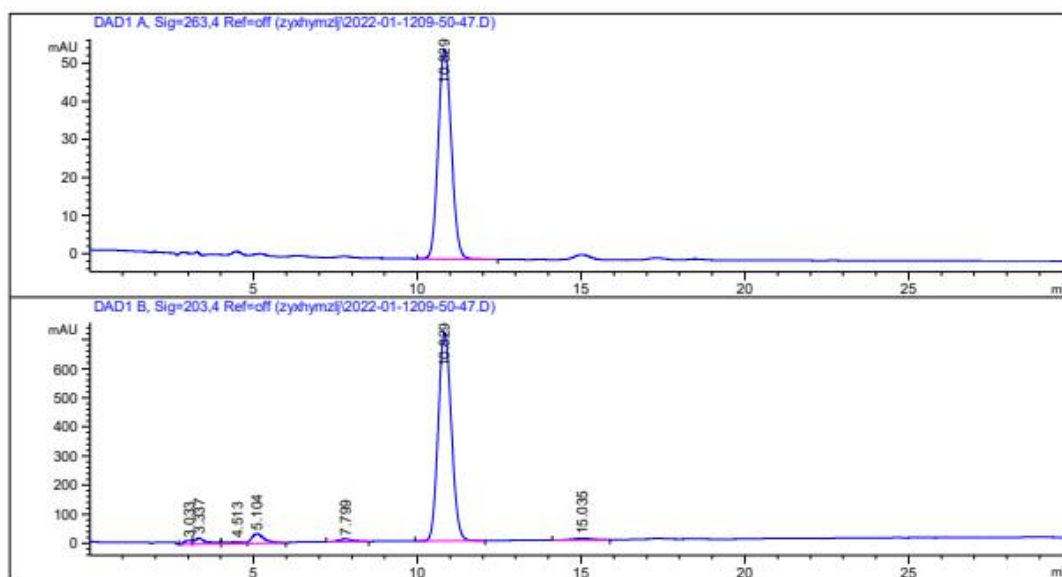

*Figure S3. The HPLC data of 4b*

4c:

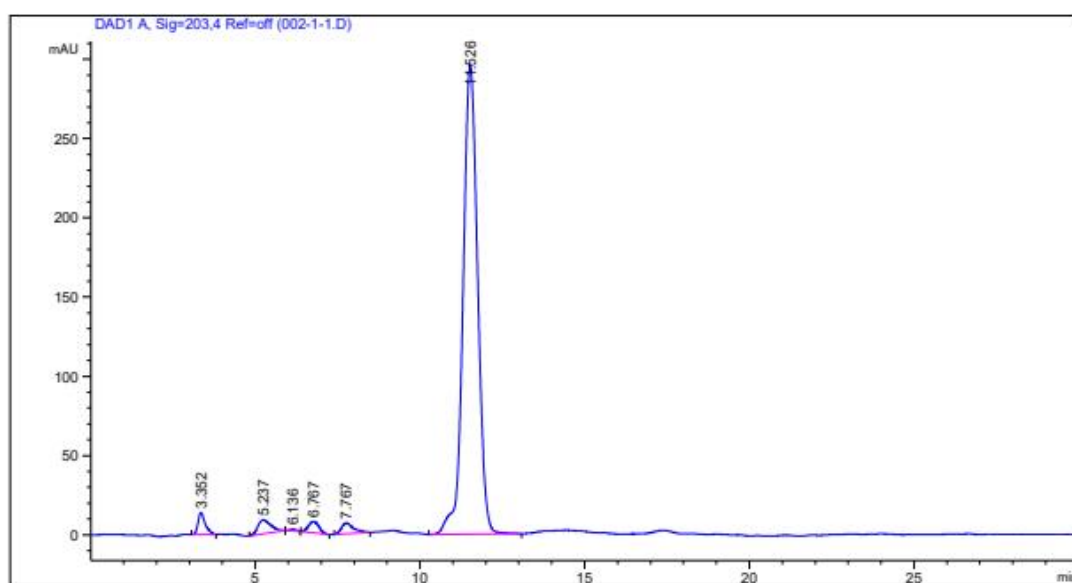

*Figure S4. The HPLC data of 4c*

4d:

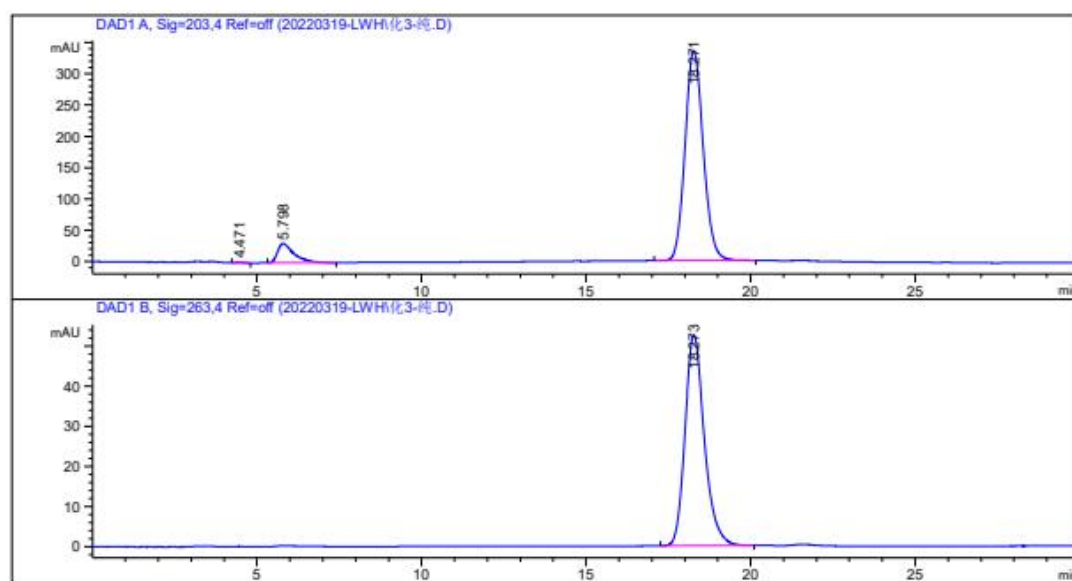

*Figure S5. The HPLC data of 4d*

4e:

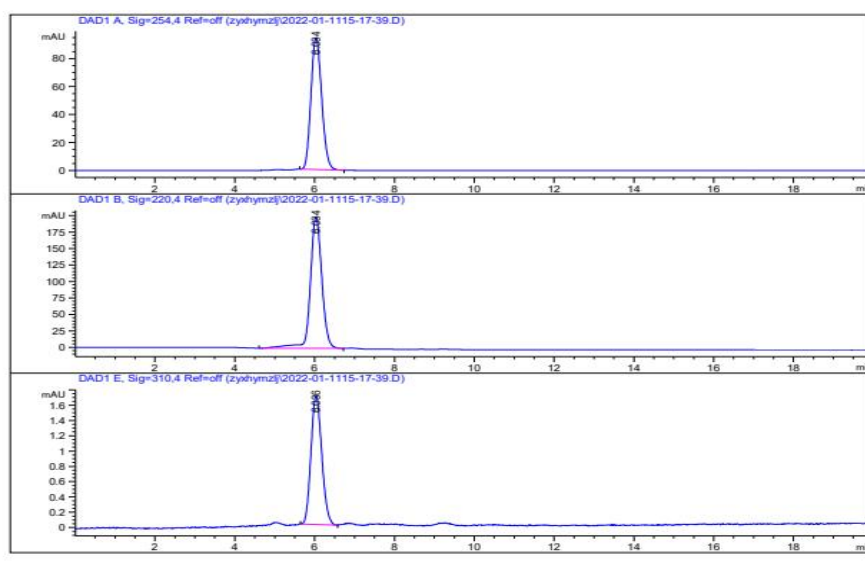

*Figure S6. The HPLC data of 4e*

4f:

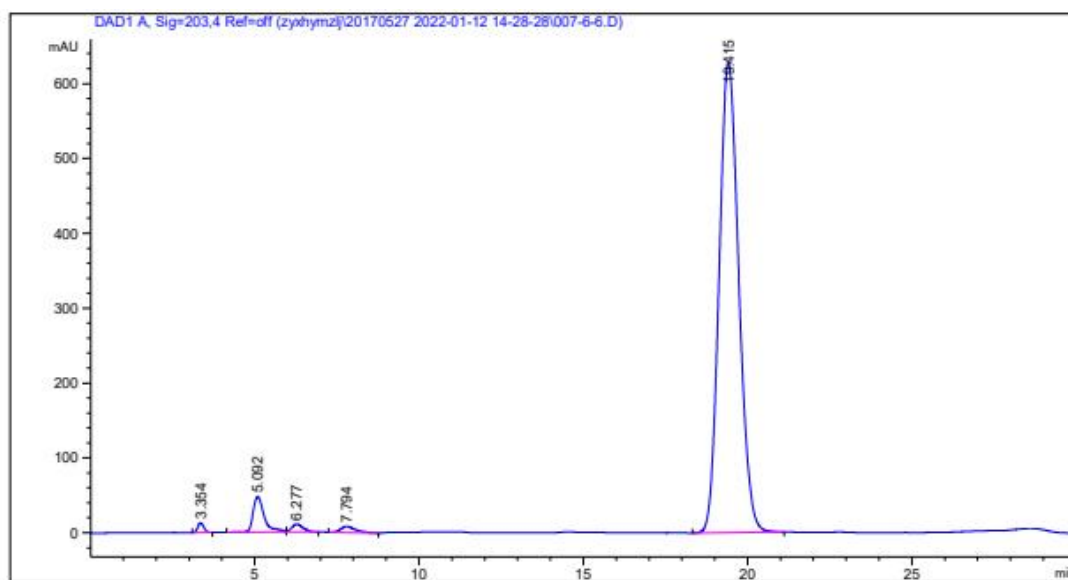

*Figure S7. The HPLC data of 4f*

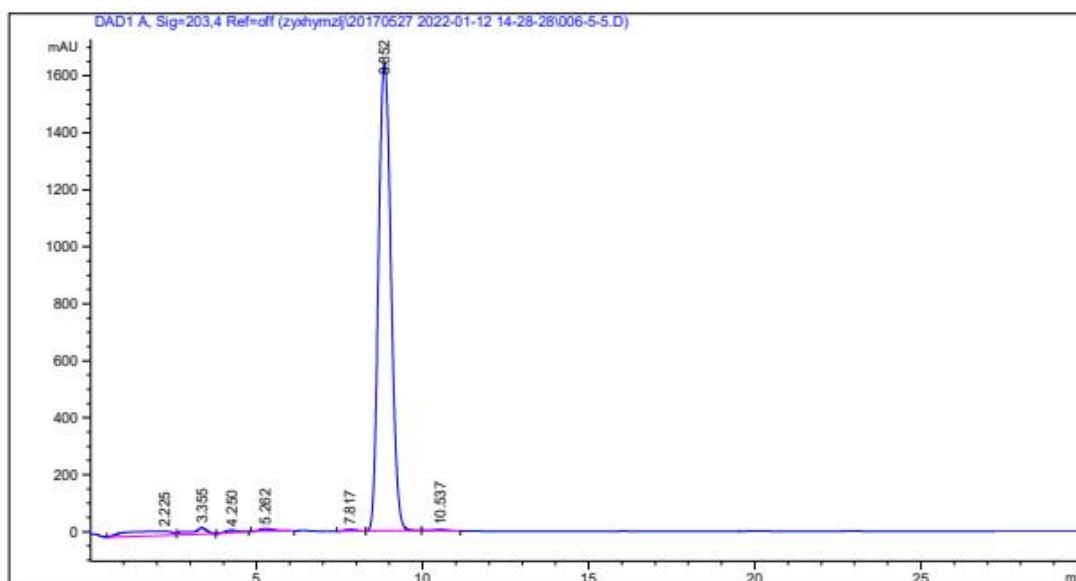

**Figure S8.** The HPLC data of **4g**

**4h:**

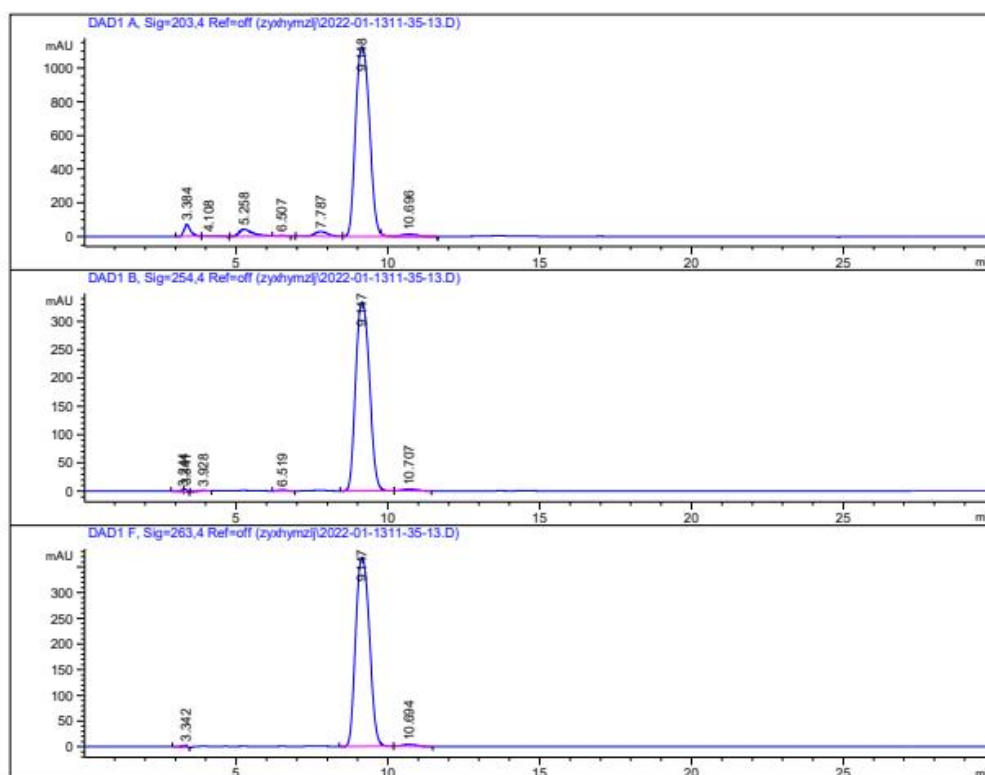

**Figure S9.** The HPLC data of **4h**



4i:

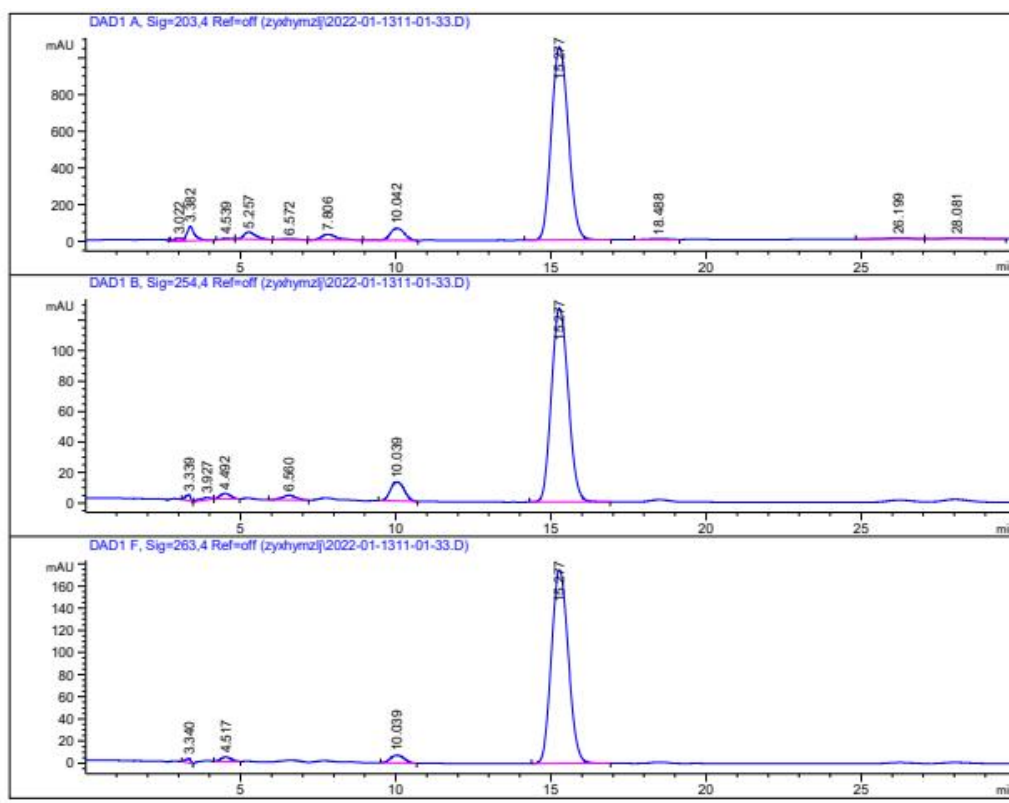

*Figure S10. The HPLC data of 4i*

4j:

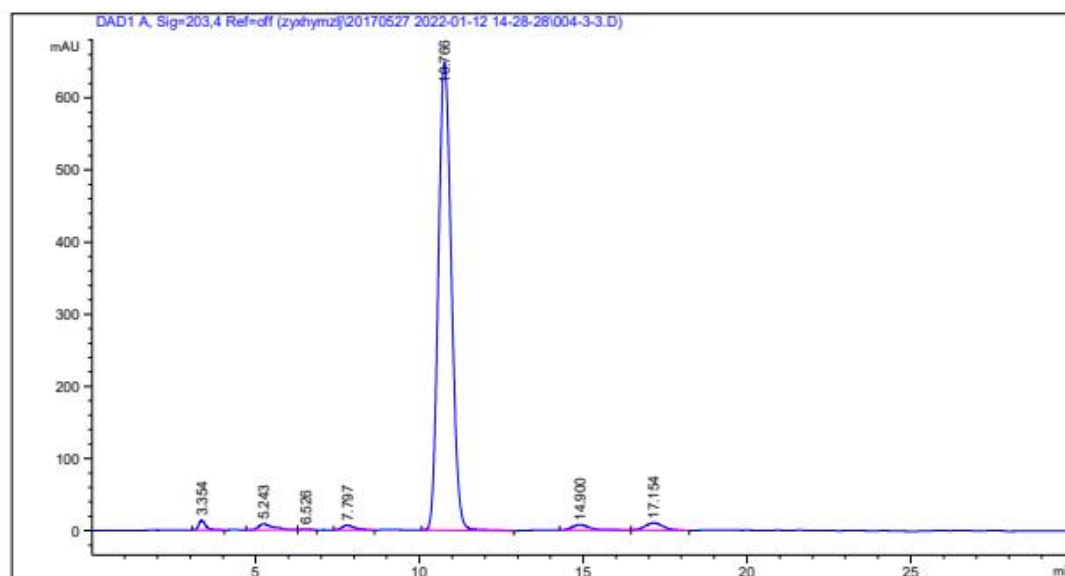

*Figure S11. The HPLC data of 4k*

4k:

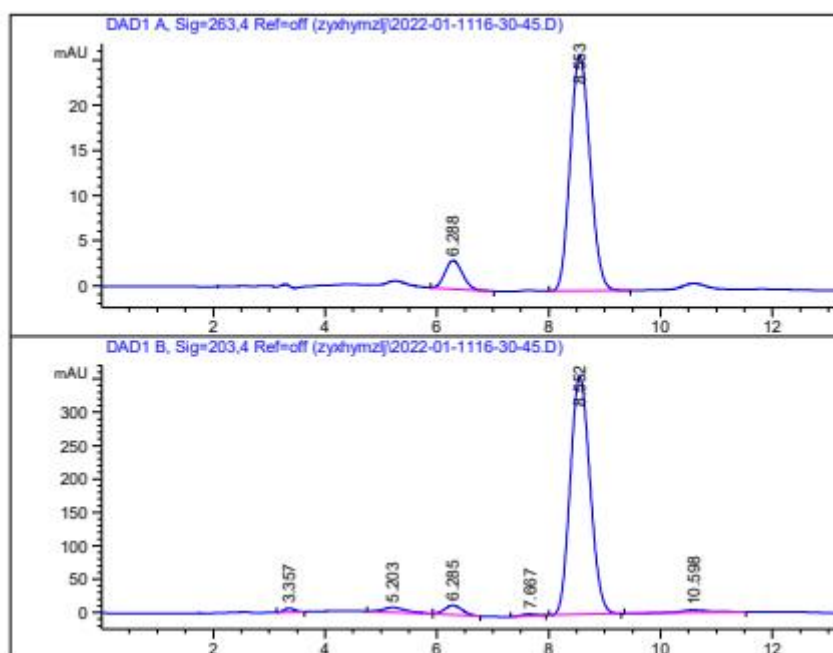

Figure S12. The HPLC data of 4k

4l:

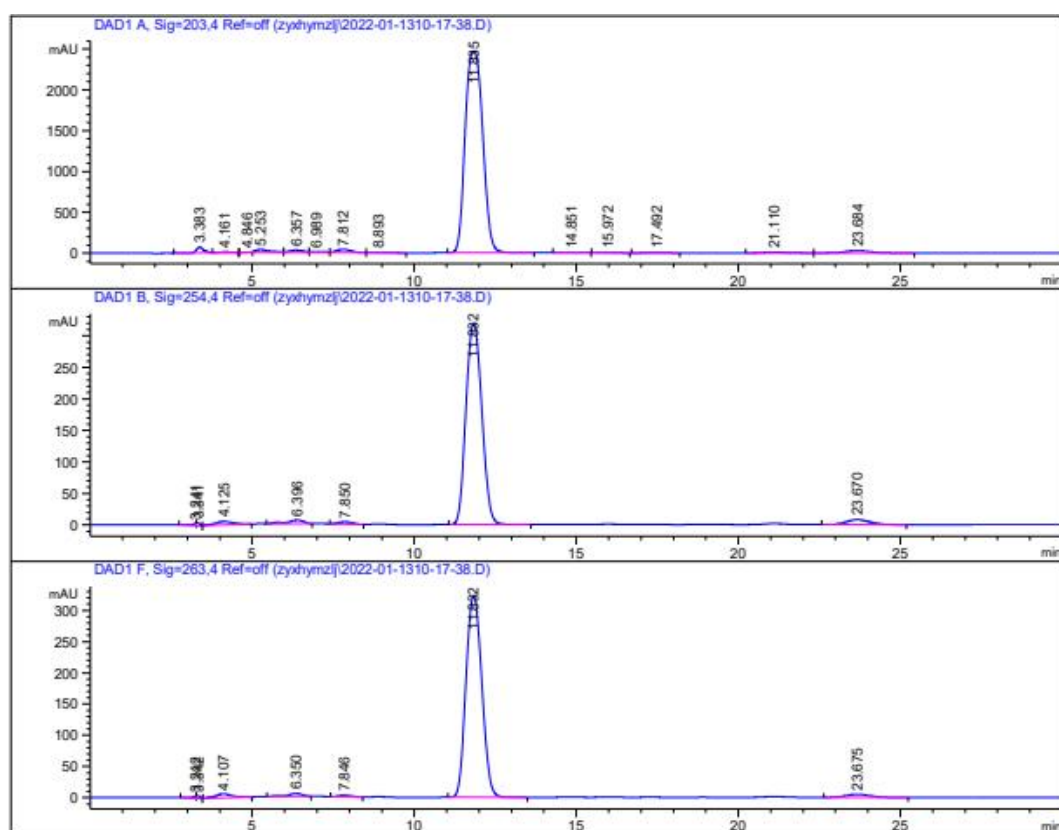

Figure S13. The HPLC data of 4l

4m:

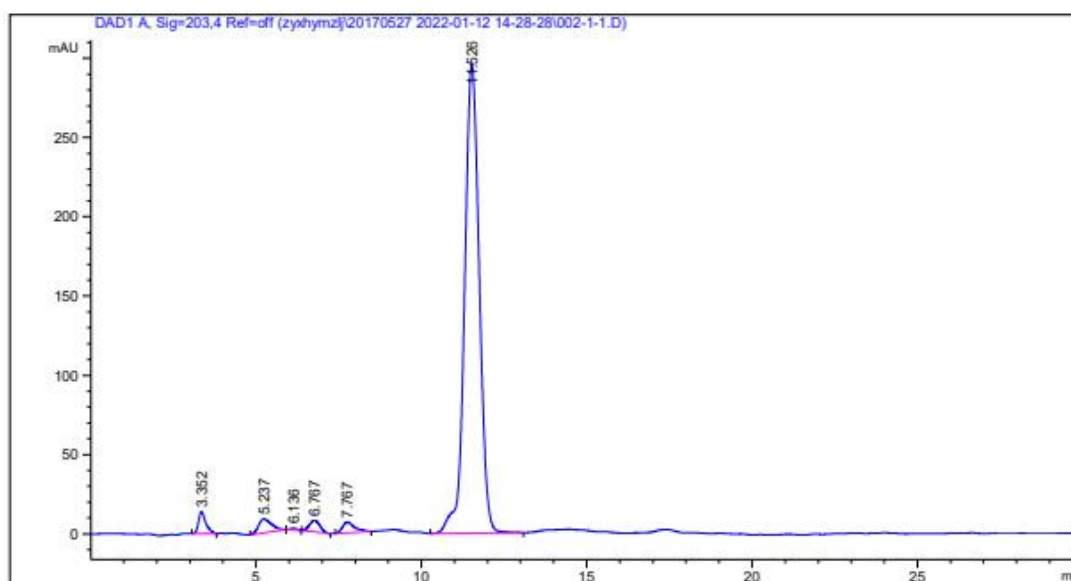

*Figure S14. The HPLC data of 4m*

4n:

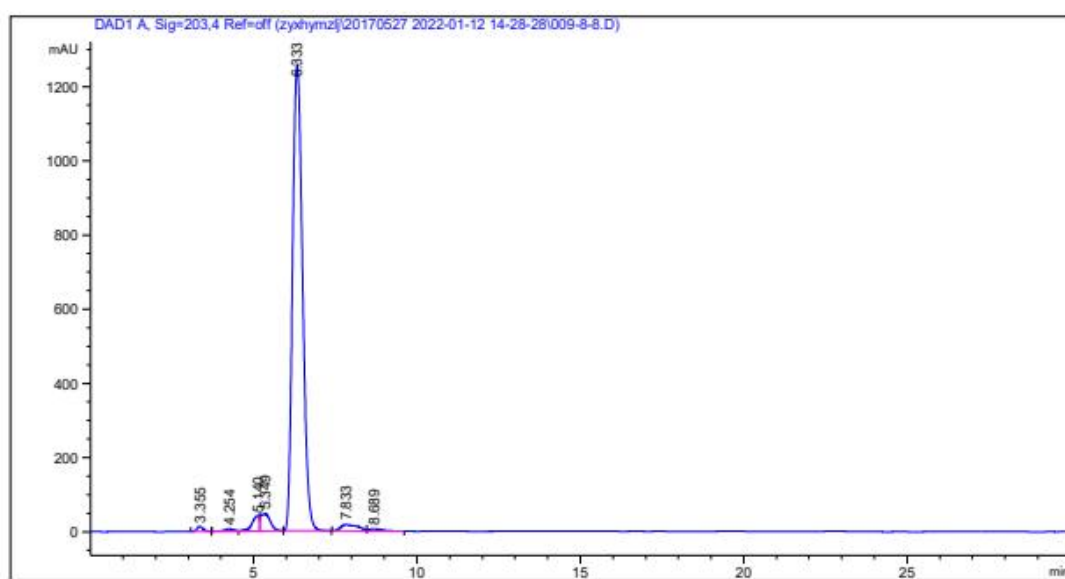

*Figure S15. The HPLC data of 4n*

4o:

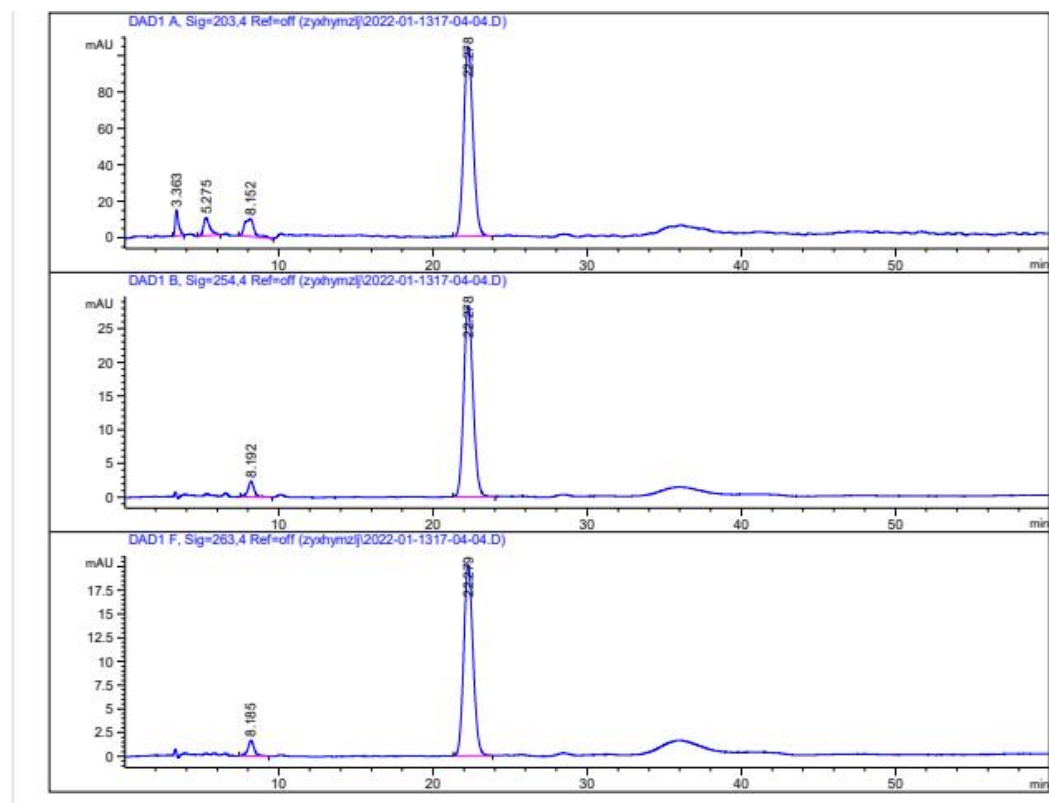

Figure S16. The HPLC data of 4o

4p:

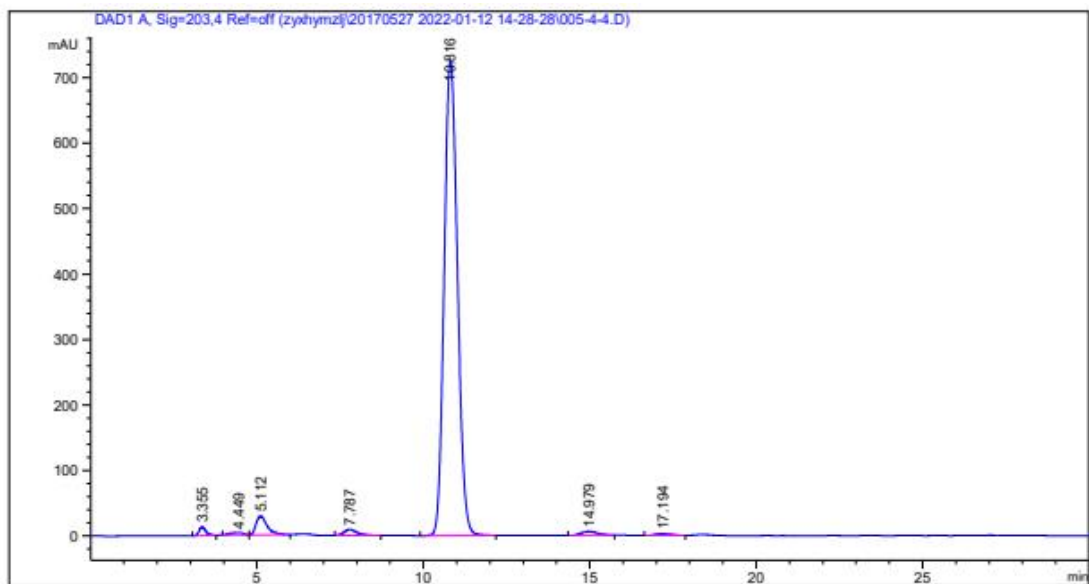

Figure S17. The HPLC data of 4p

**4a:**

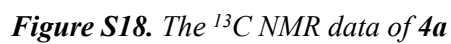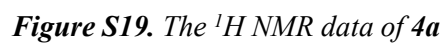

10072021  
G-26 cdc13 2021-10-7

Clc1ccc2nc(NC(=O)CN(Cc3ccccc3)c4ccccc4)nc2s1

142.60, 138.78, 134.70, 133.62, 129.95, 128.95, 128.72, 128.10, 126.22, 124.17, 119.28, 111.28, 100.03, 77.30, 77.05, 76.79, 53.95, 49.58, 29.40

1200, 1100, 1000, 900, 800, 700, 600, 500, 400, 300, 200, 100, 0, -100

f1 (ppm)

**Figure S20.** The  $^{13}\text{C}$  NMR data of **4b**

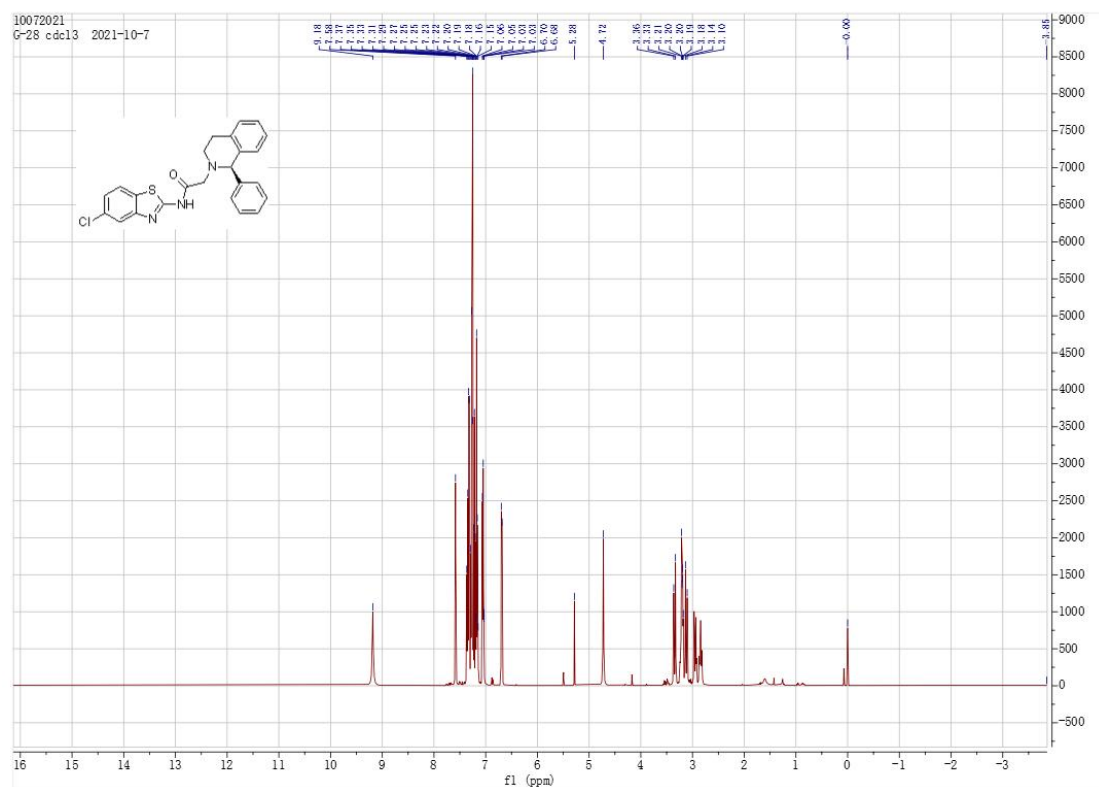

**Figure S21.** The  $^1\text{H}$  NMR data of **4b**

4c:

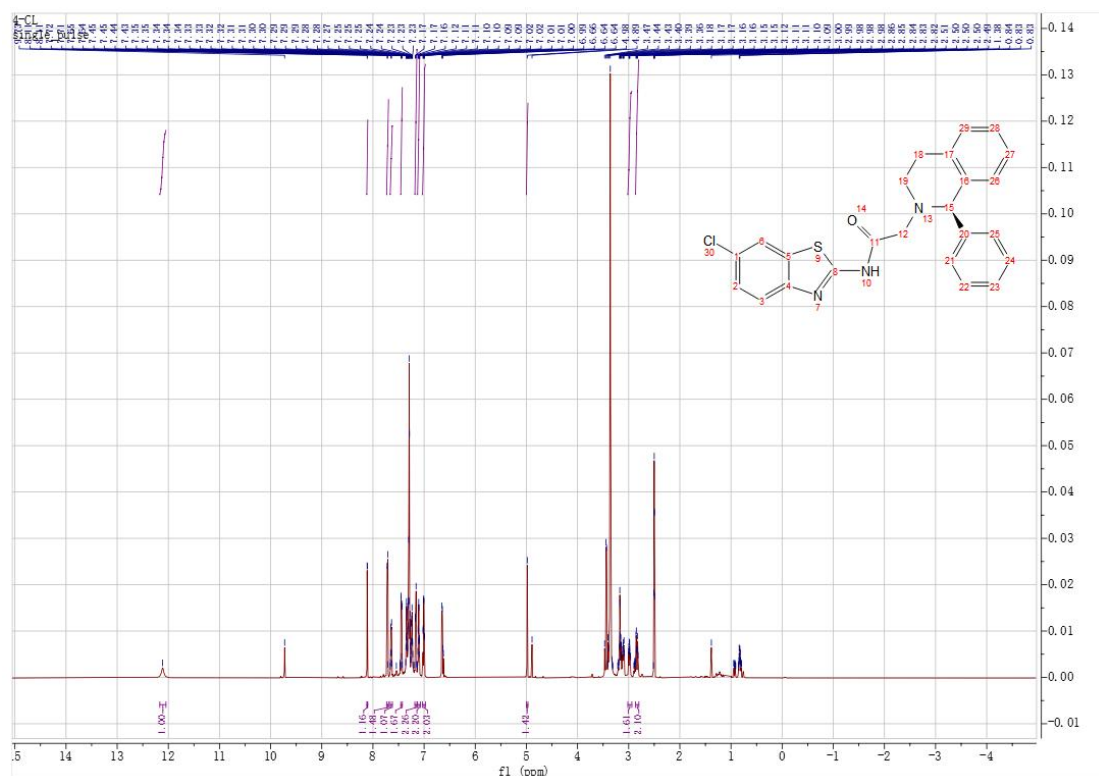

Figure S22. The  $^{13}\text{C}$  NMR data of 4c

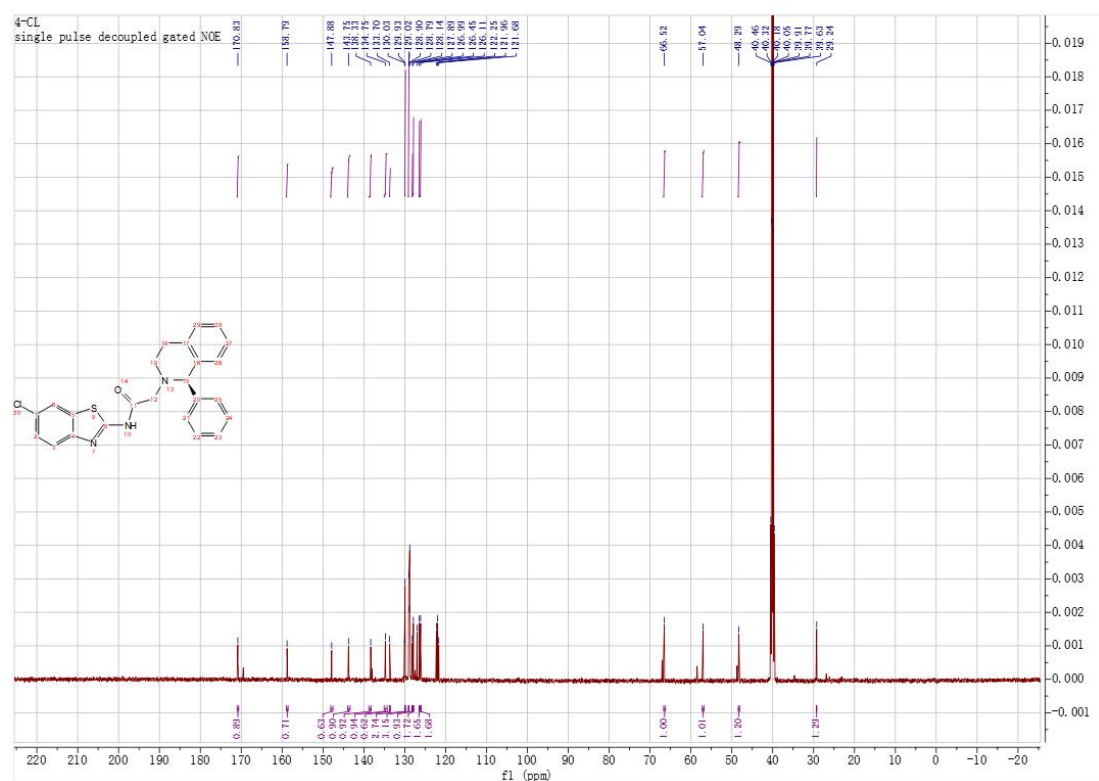

Figure S23. The  $^1\text{H}$  NMR data of 4c



[illegible]

**Figure S24.** The  $^{13}\text{C}$  NMR data of **4d**

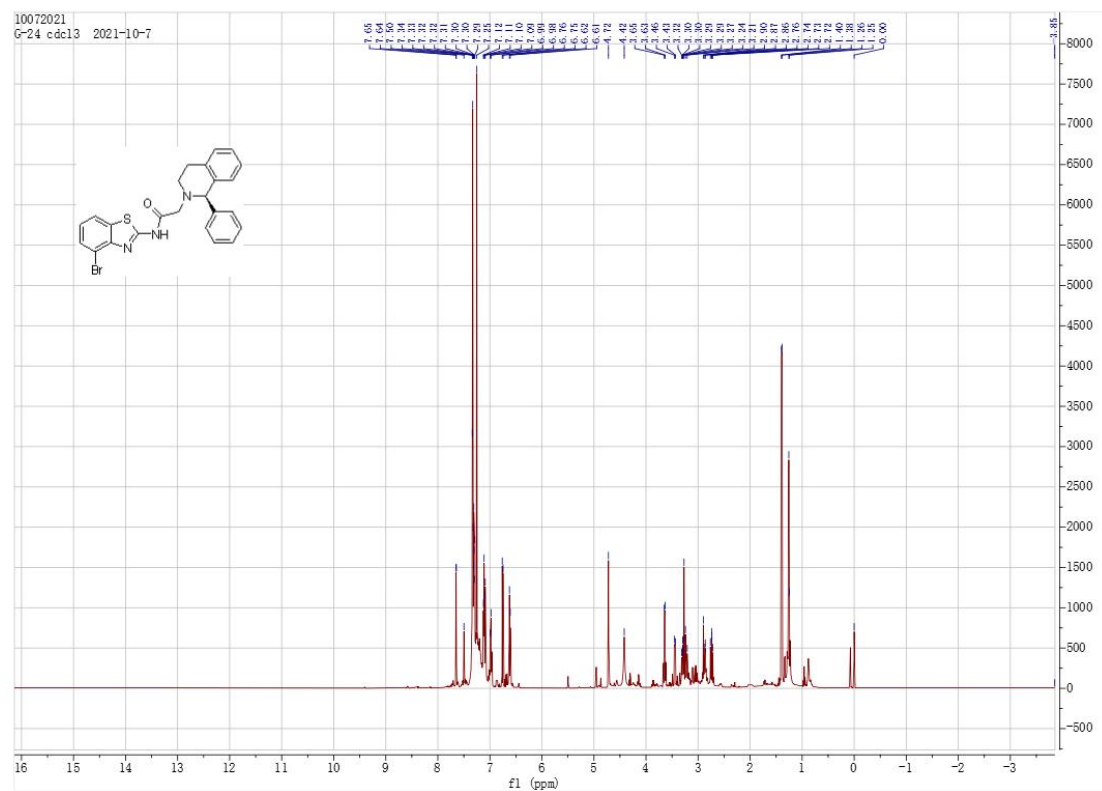

**Figure S25.** The  $^1\text{H}$  NMR data of **4d**



4e:

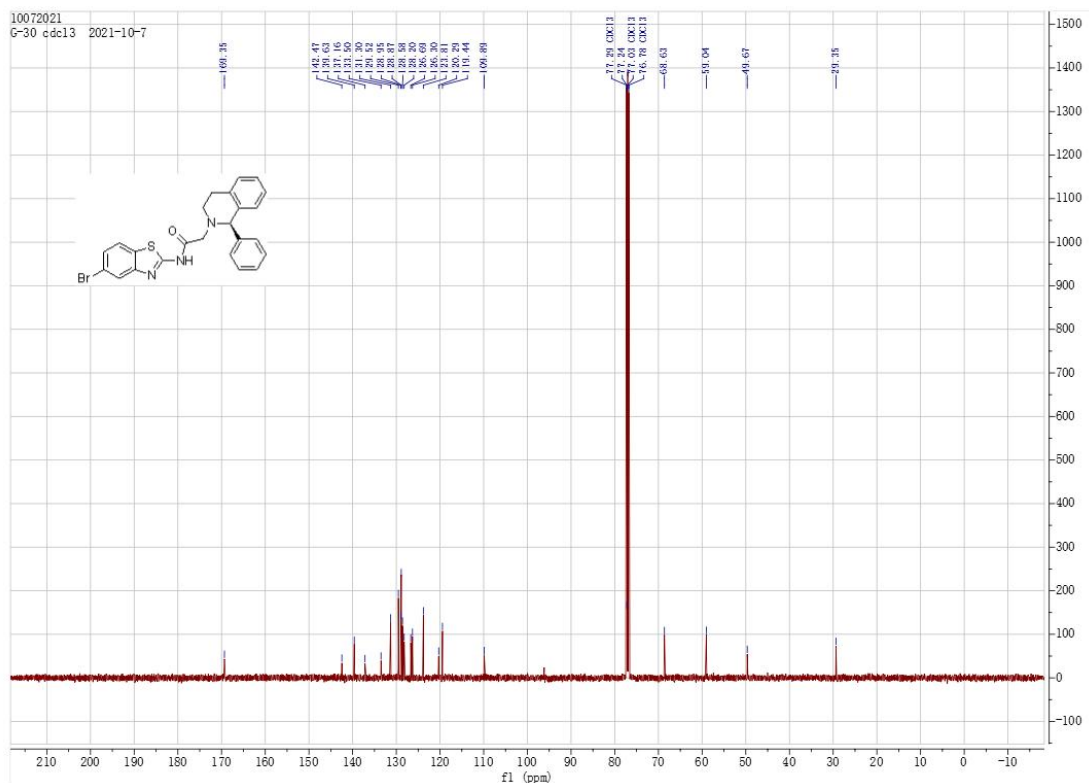

Figure S26. The  $^{13}\text{C}$  NMR data of 4e

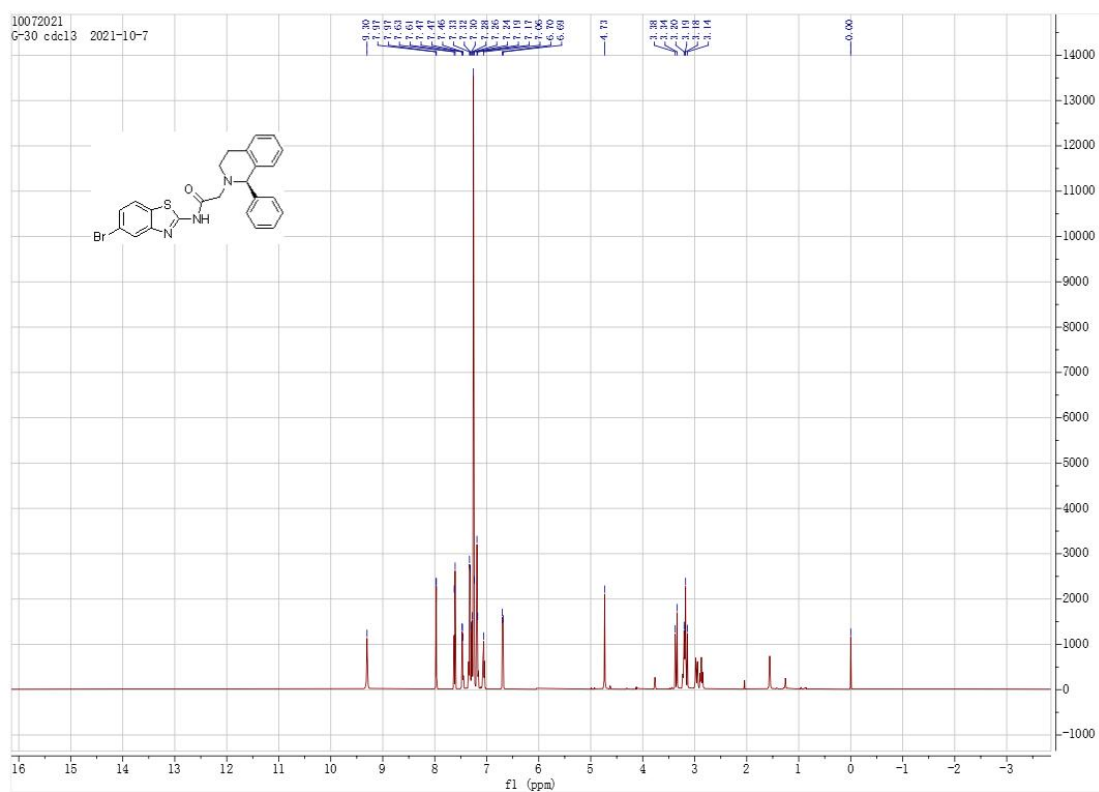

Figure S27. The  $^1\text{H}$  NMR data of 4e

**4f:**

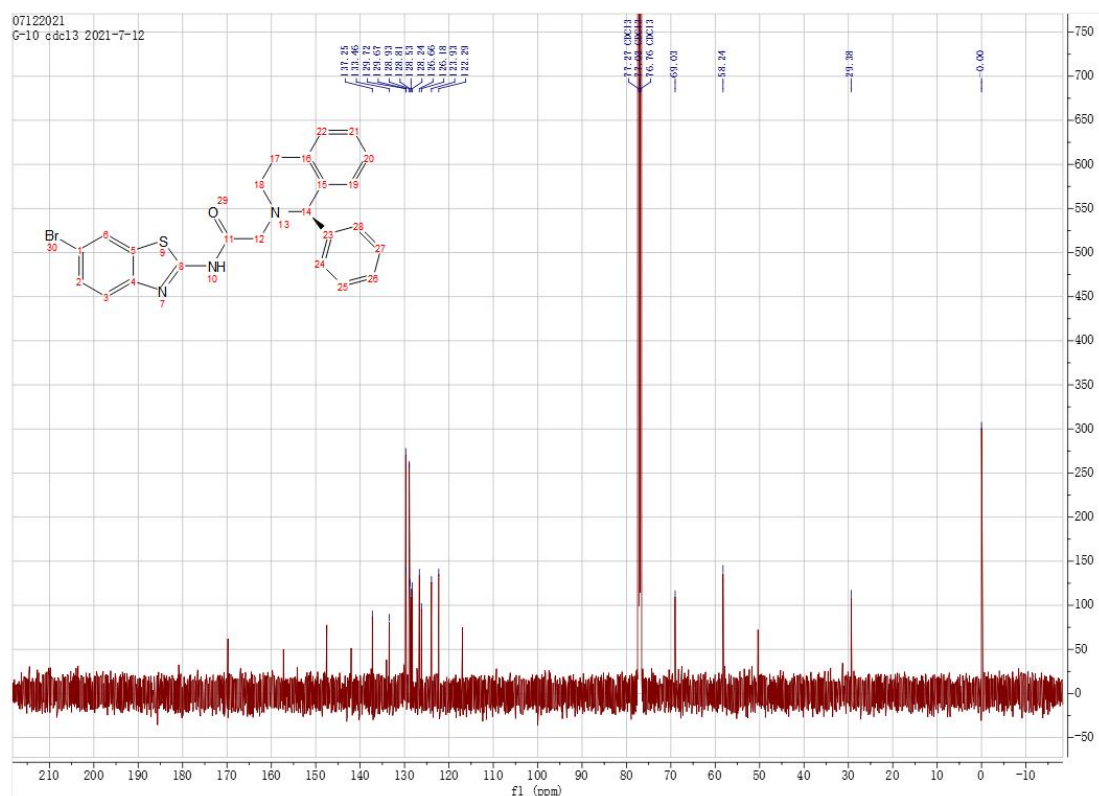

**Figure S28.** The  $^{13}\text{C}$  NMR data of **4f**

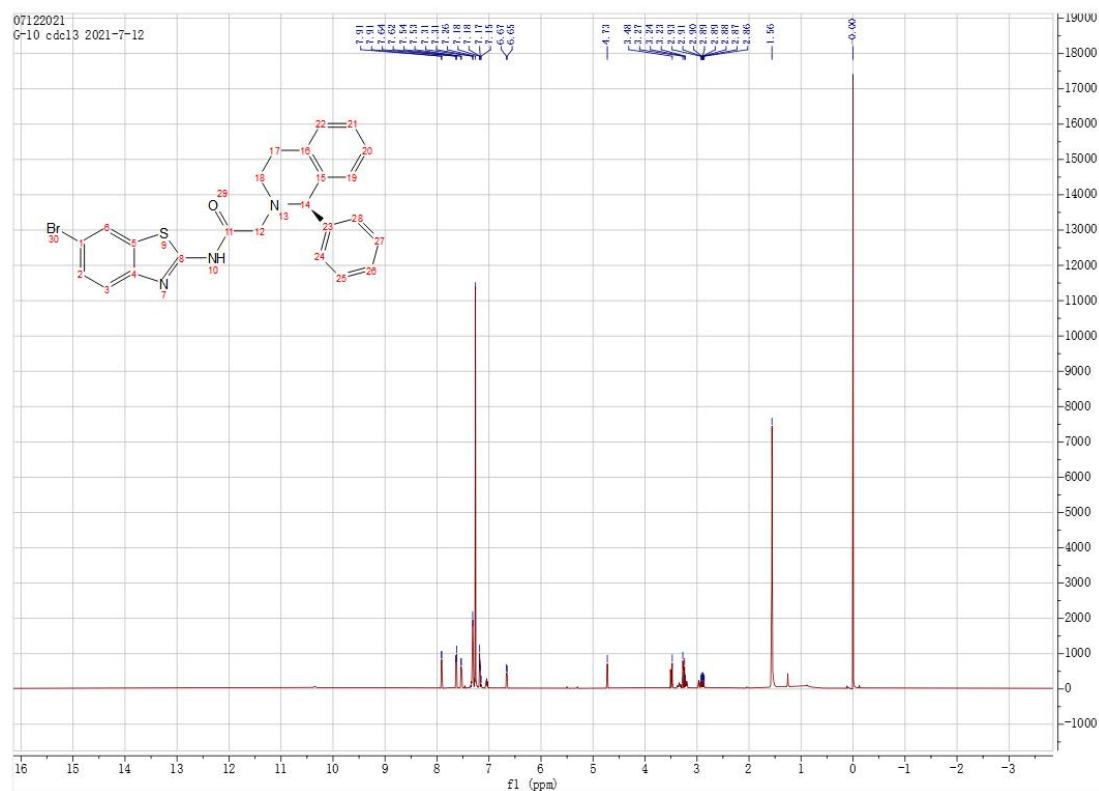

**Figure S29.** The  $^1\text{H}$  NMR data of **4f**

|            |           |  |
|------------|-----------|--|
| 07122021   |           |  |
| G-11 cdc13 | 2021-7-12 |  |

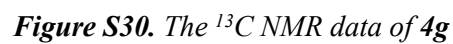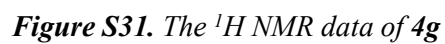

**4h:**

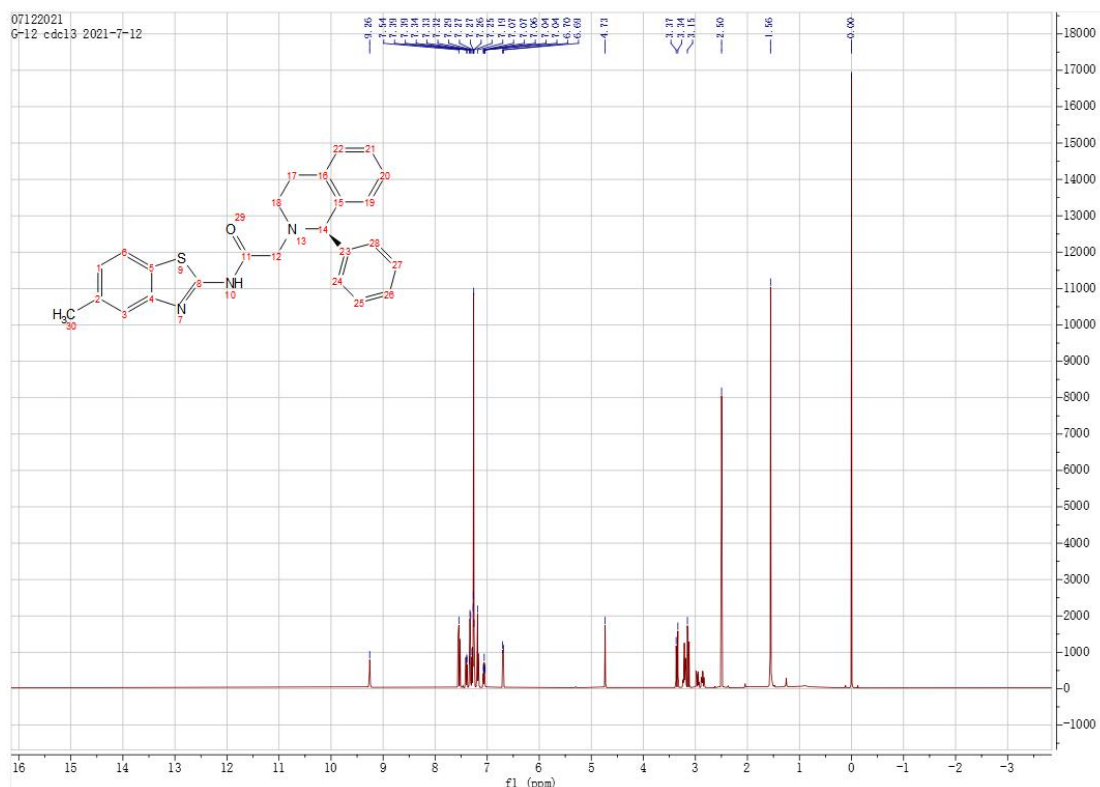

**Figure S32.** The  $^{13}\text{C}$  NMR data of **4h**

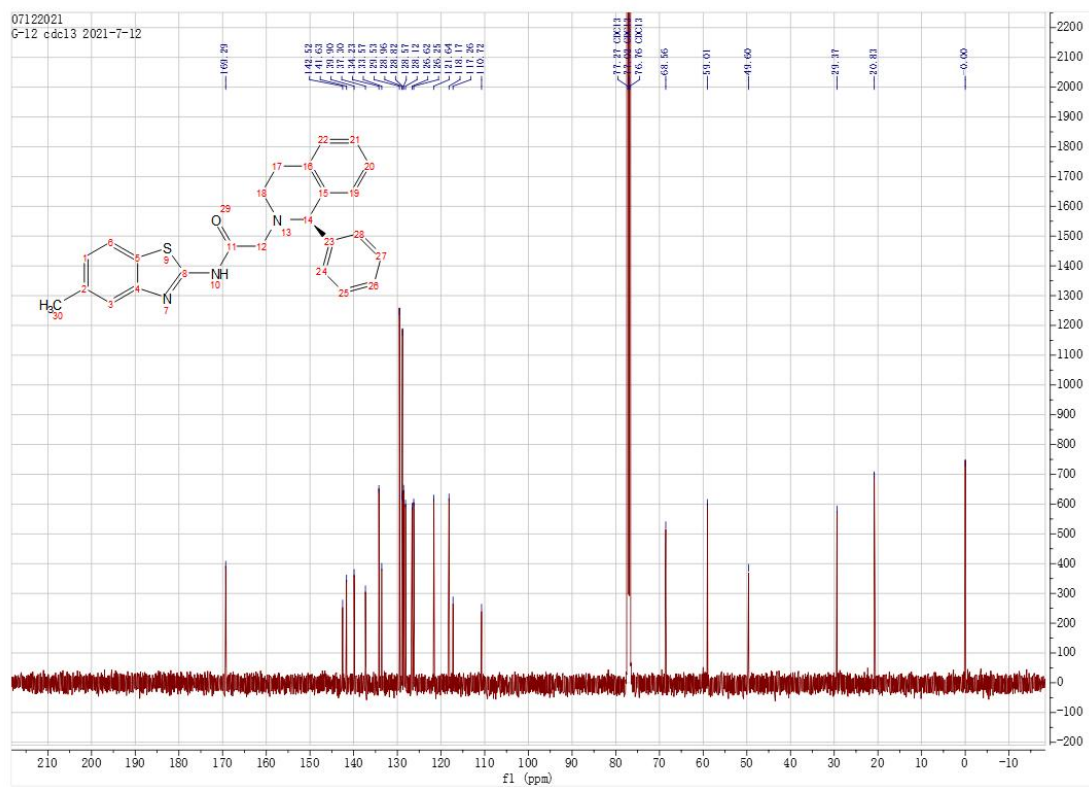

**Figure S33.** The  $^1\text{H}$  NMR data of **4h**

4i:

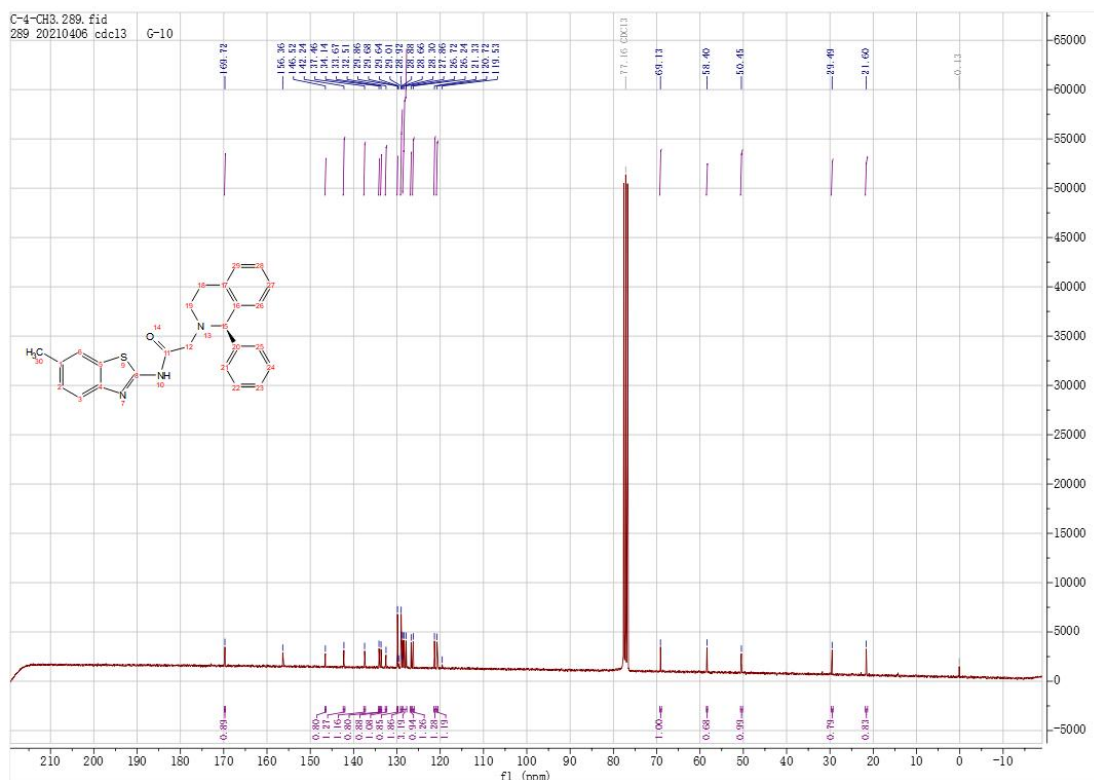

Figure S34. The  $^{13}\text{C}$  NMR data of 4i

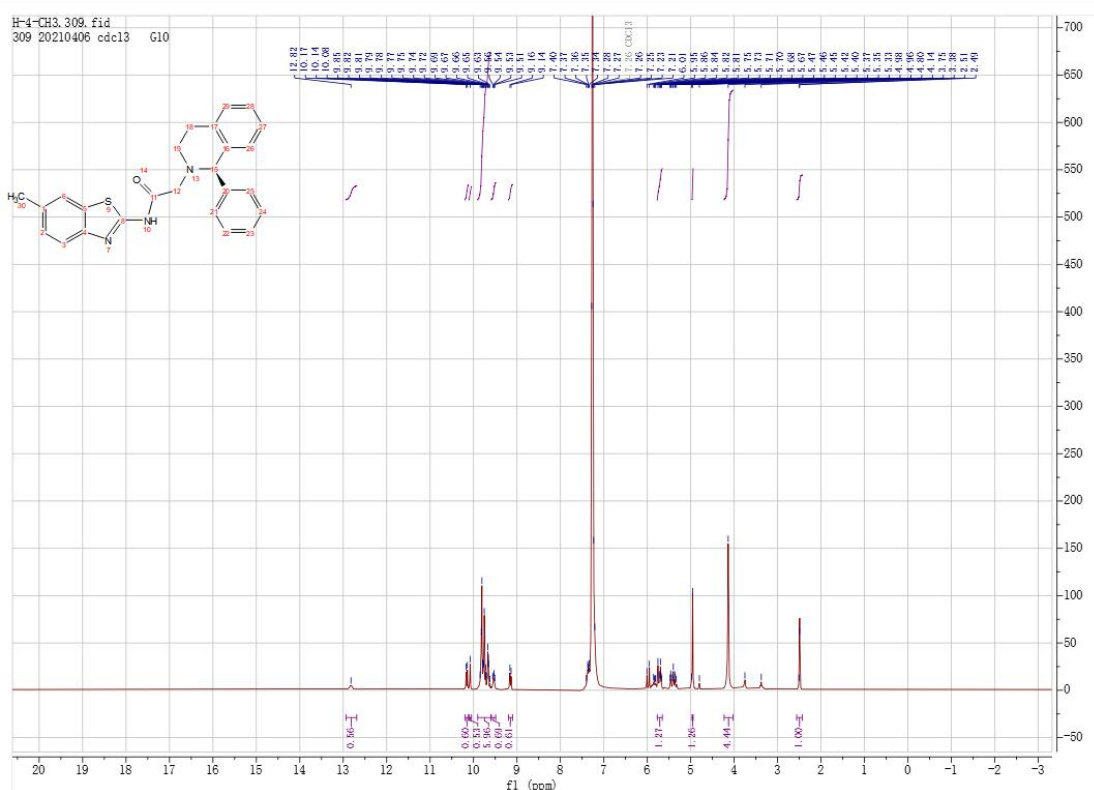

4j:

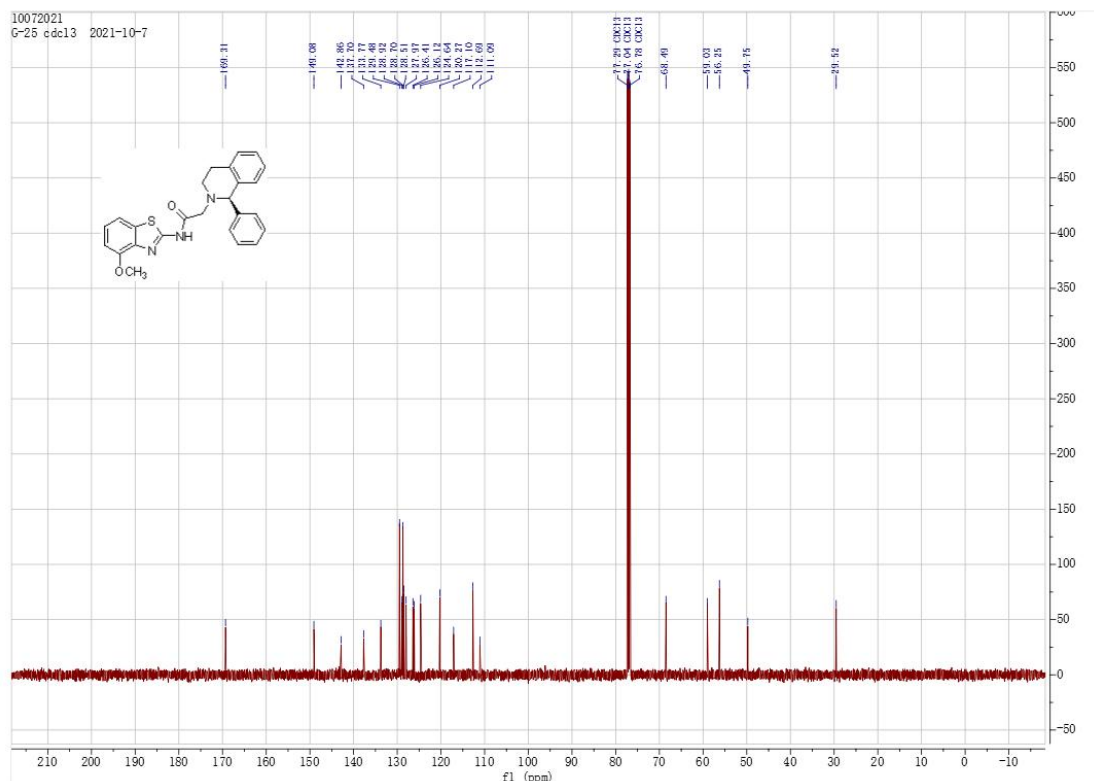

Figure S36. The  $^{13}\text{C}$  NMR data of 4j

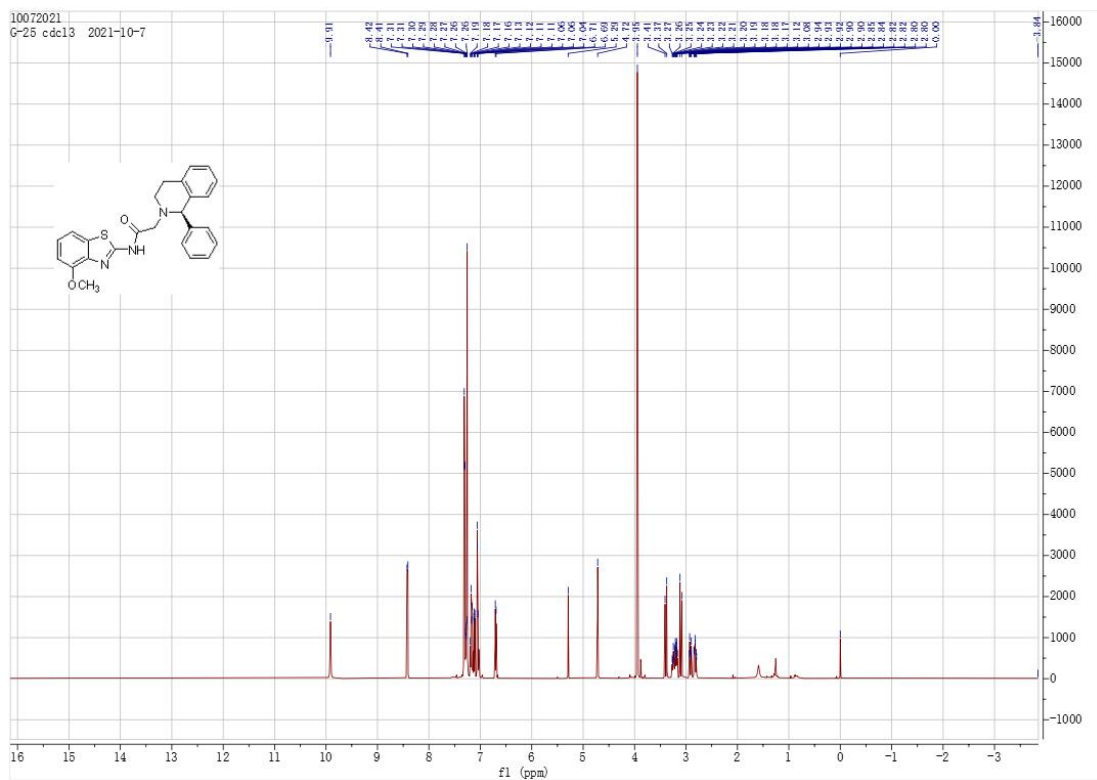

Figure S37. The  $^1\text{H}$  NMR data of 4j

10072021  
G-26 cdc13 2021-10-7

COc1ccc2nc(NC(=O)CN(c3ccccc3)c4ccccc4)sc2c1

160.34  
128.38  
125.71  
125.05  
124.95  
123.78  
123.67  
123.54  
111.50  
110.00  
105.07  
77.26 CDC13  
77.01 CDC13  
76.76 CDC13  
68.40  
58.50  
55.35  
49.46  
23.37

f1 (ppm)

10072021  
G-26 cdc13 2021-10-7

COC1=CC=C2C(=C1)N=C(NC(=O)CN(C2)C3=CC=CC=C3)C4=CC=CC=C4

9.15  
7.31  
7.27  
7.28  
7.27  
7.21  
7.21  
7.20  
7.18  
7.16  
7.09  
4.73  
3.80  
3.36  
3.23  
3.23  
3.22  
3.19  
3.18  
3.18  
3.09  
0.00  
-3.85

f1 (ppm)

**Figure S39.** The  $^1\text{H}$  NMR data of **4k**



4l:

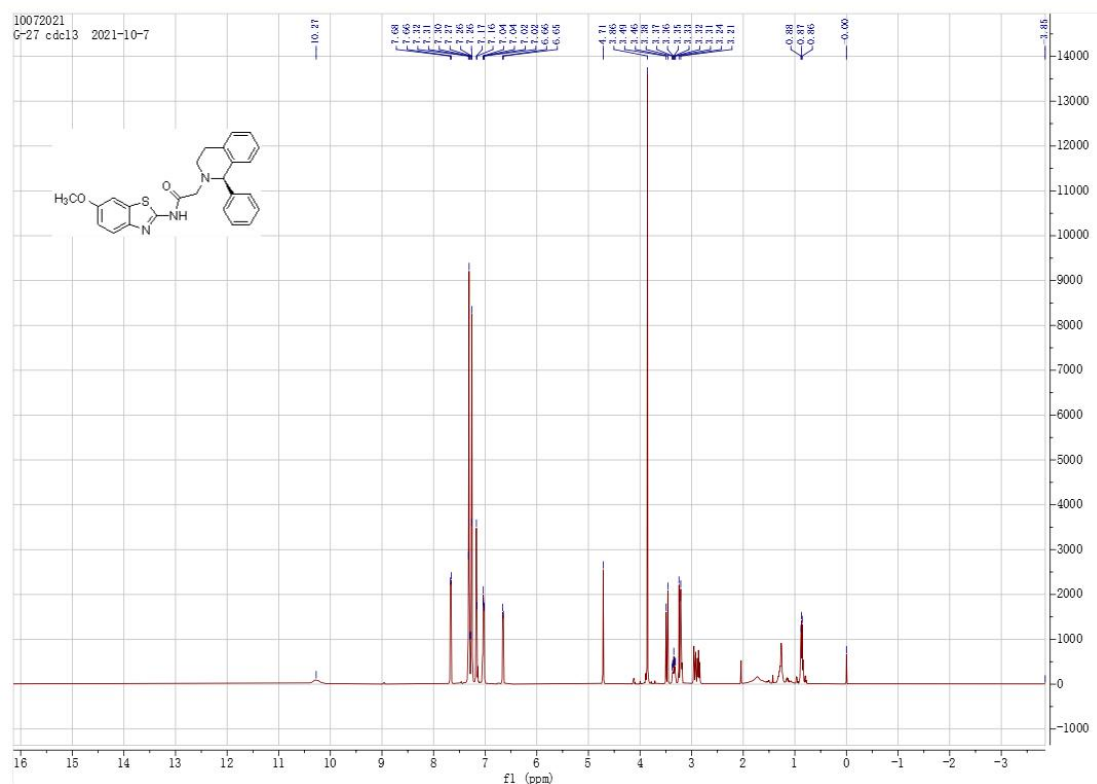

Figure S40. The  $^{13}\text{C}$  NMR data of 4l

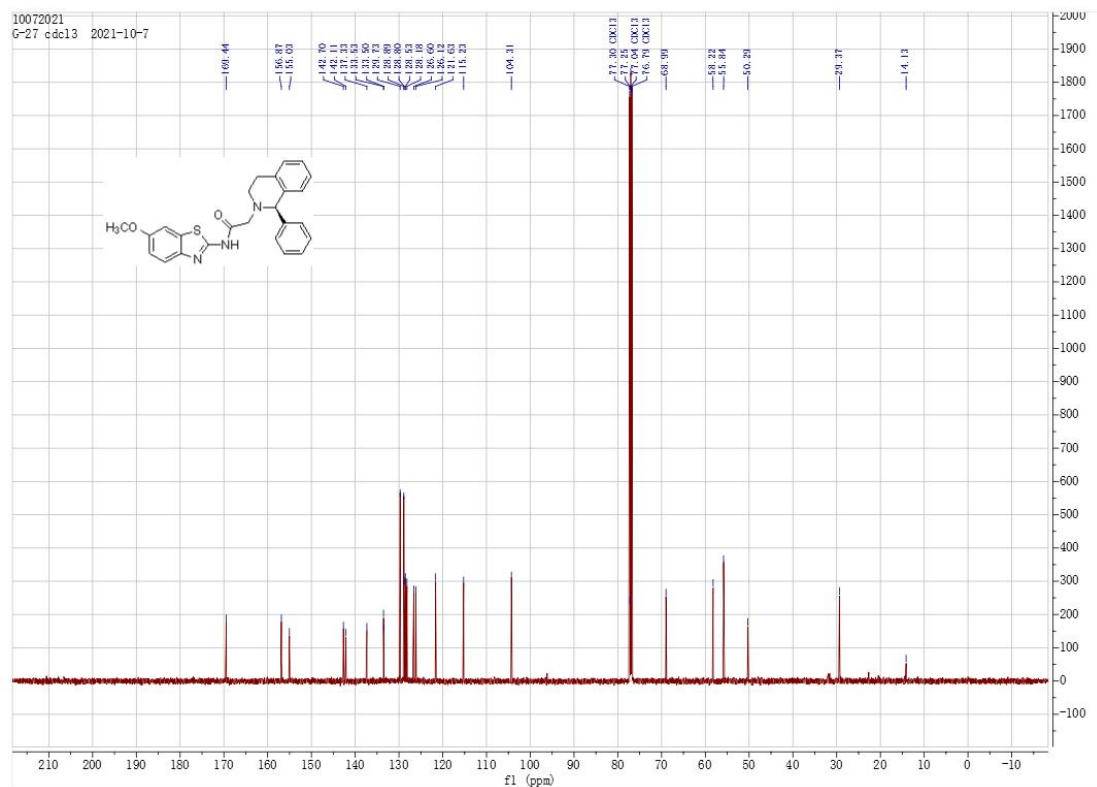

Figure S41. The  $^1\text{H}$  NMR data of 4l



**4m:**

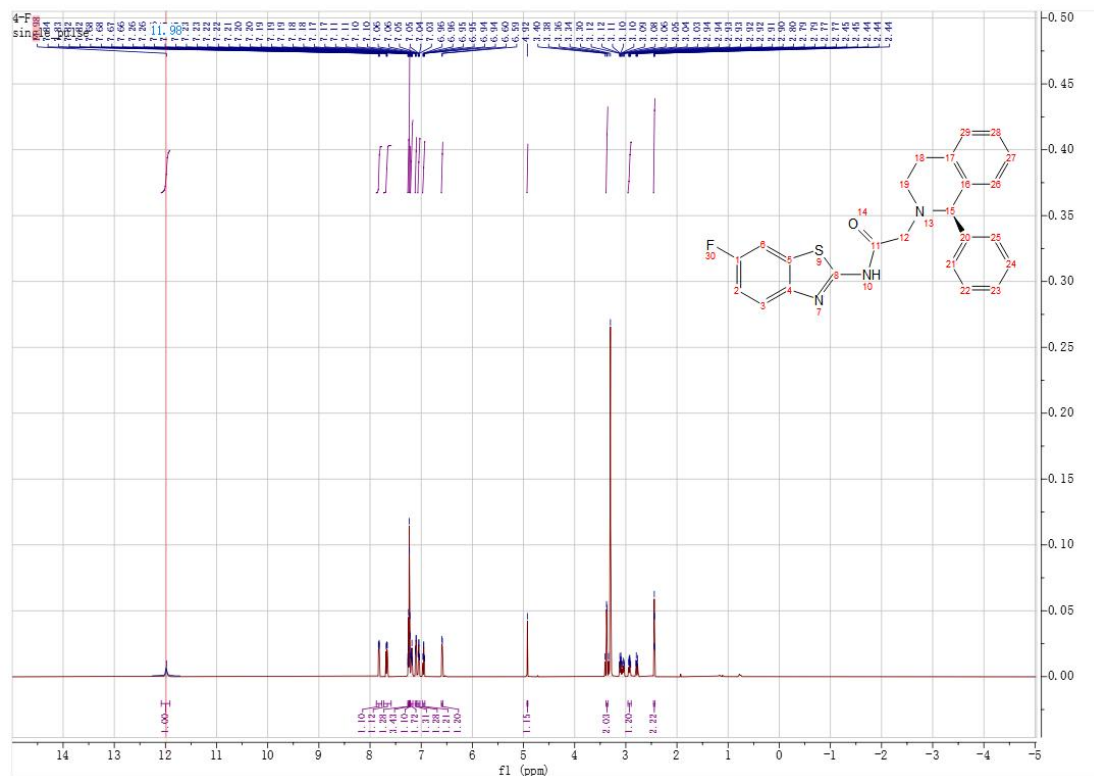

**Figure S42.** The  $^{13}\text{C}$  NMR data of **4m**

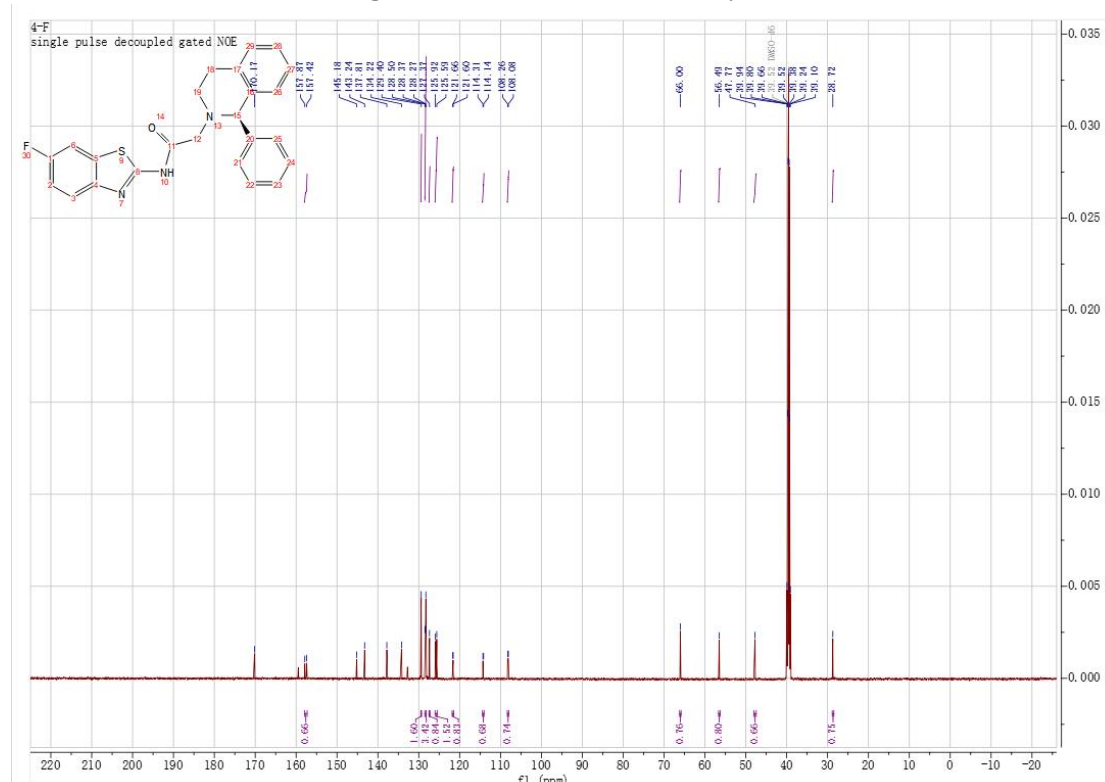

**Figure S43.** The  $^1\text{H}$  NMR data of **4m**

4n:

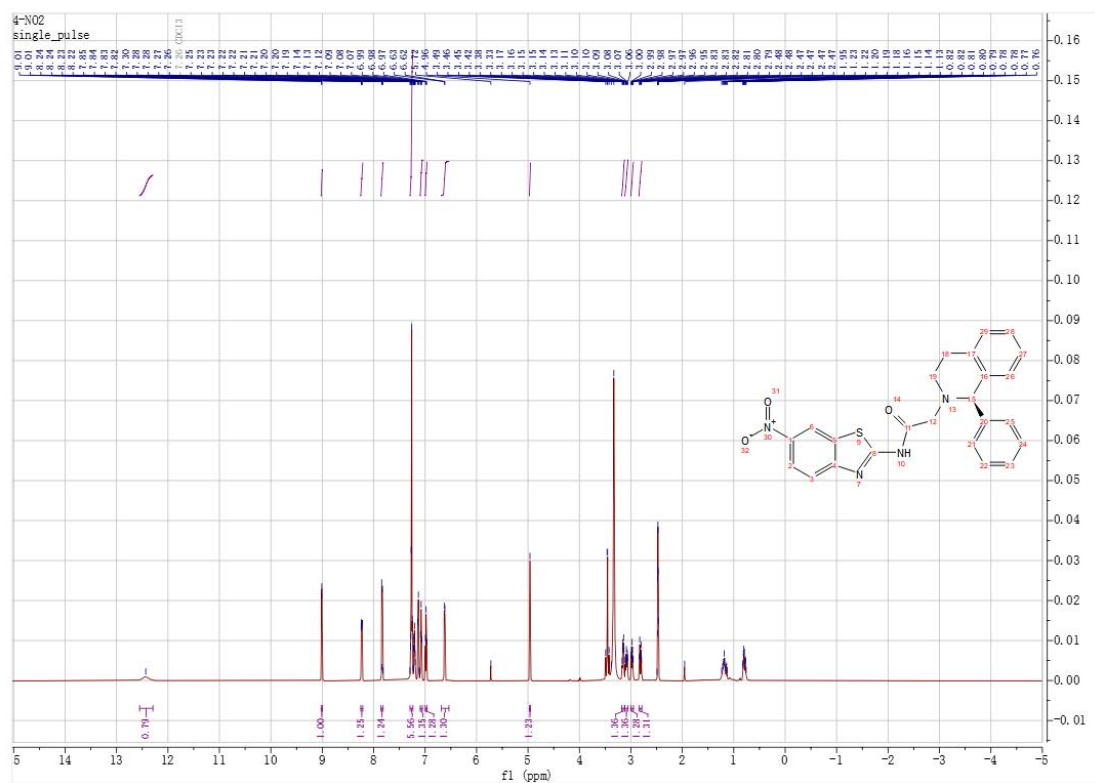

Figure S44. The  $^{13}\text{C}$  NMR data of 4n

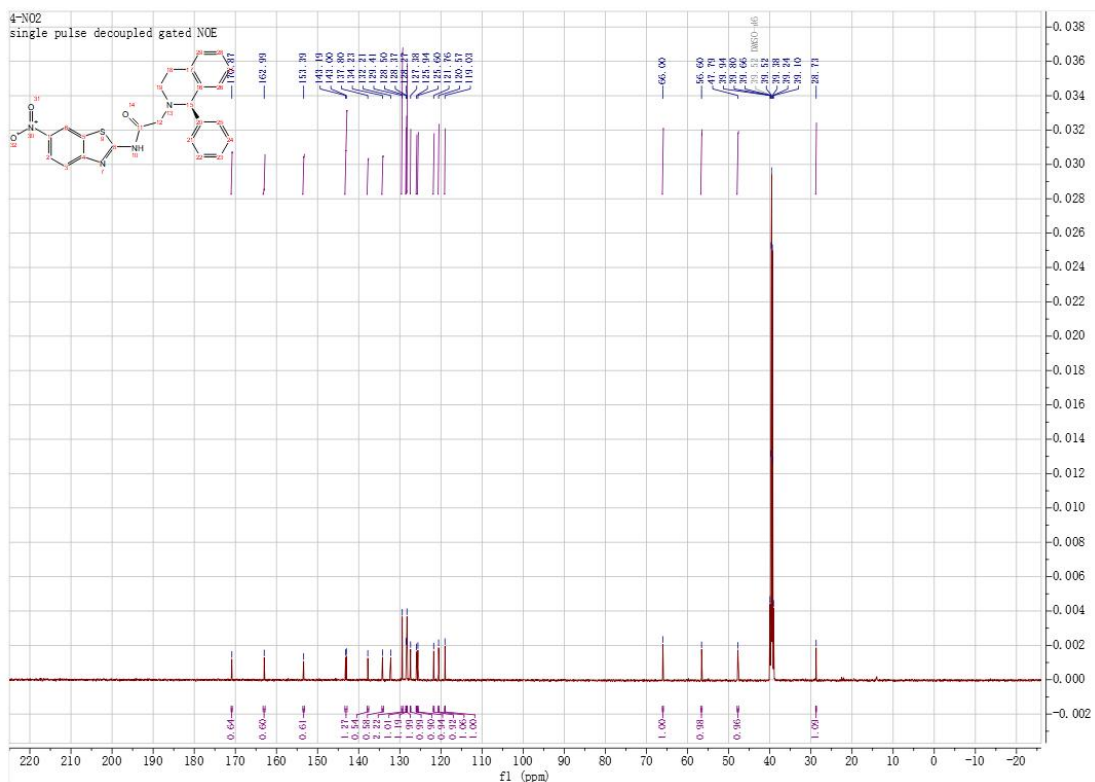

Figure S45. The  $^1\text{H}$  NMR data of 4n

**4o:**

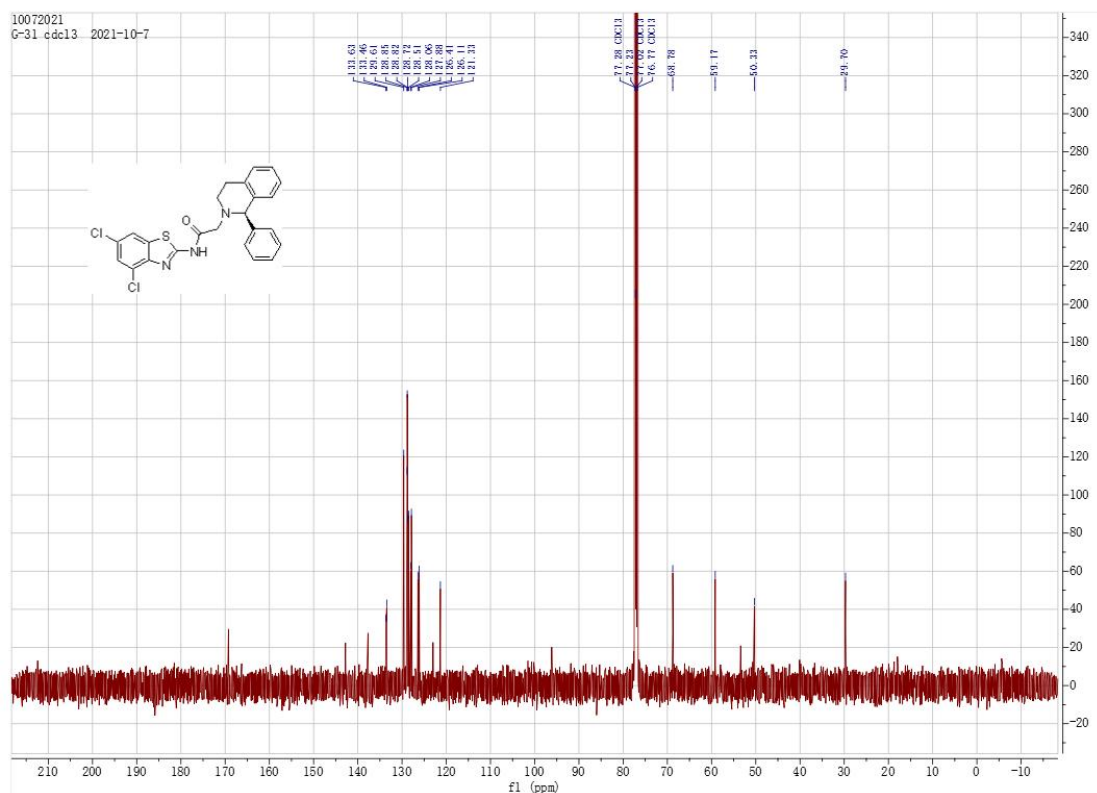

**Figure S46.** The  $^{13}\text{C}$  NMR data of **4o**

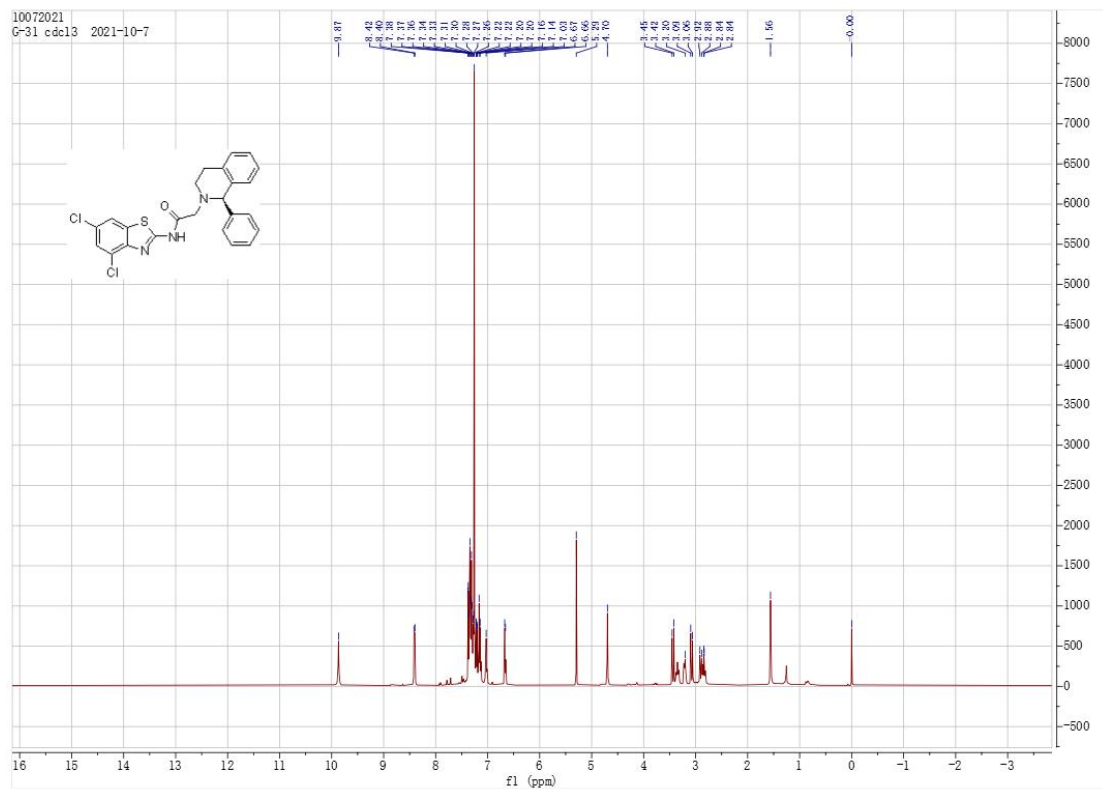

**Figure S47.** The  $^1\text{H}$  NMR data of **4o**

4p:

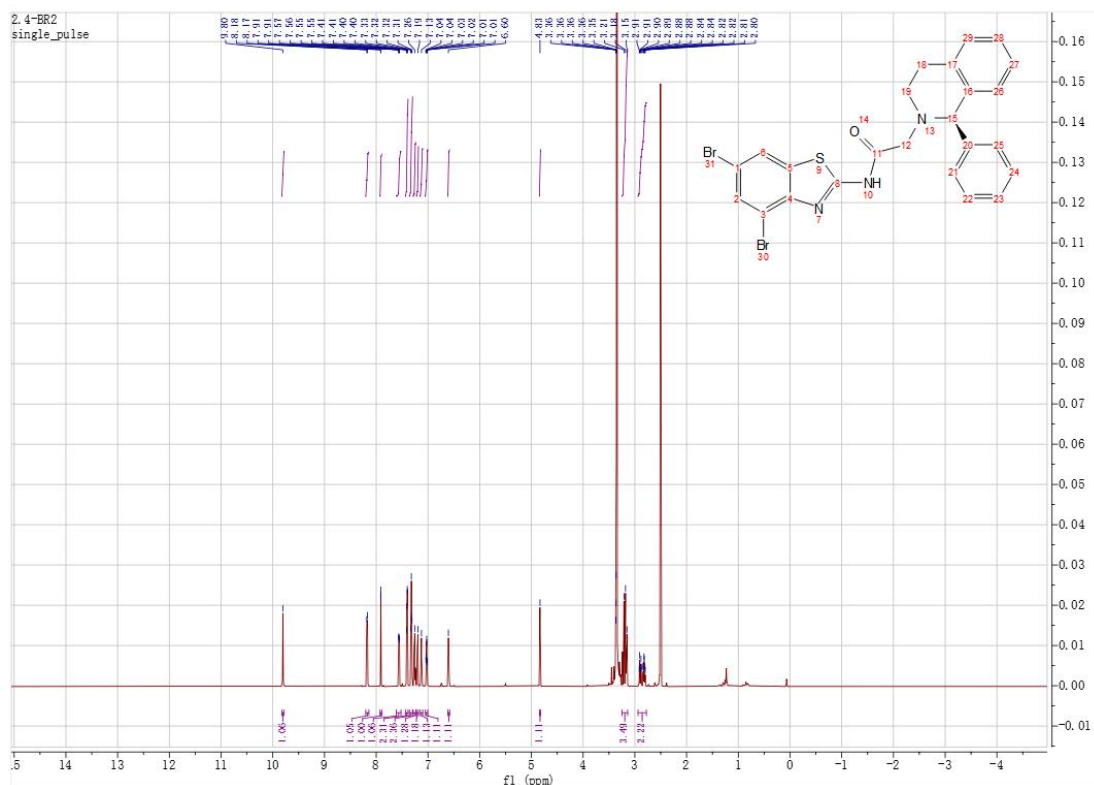

Figure S48. The  $^{13}\text{C}$  NMR data of 4p

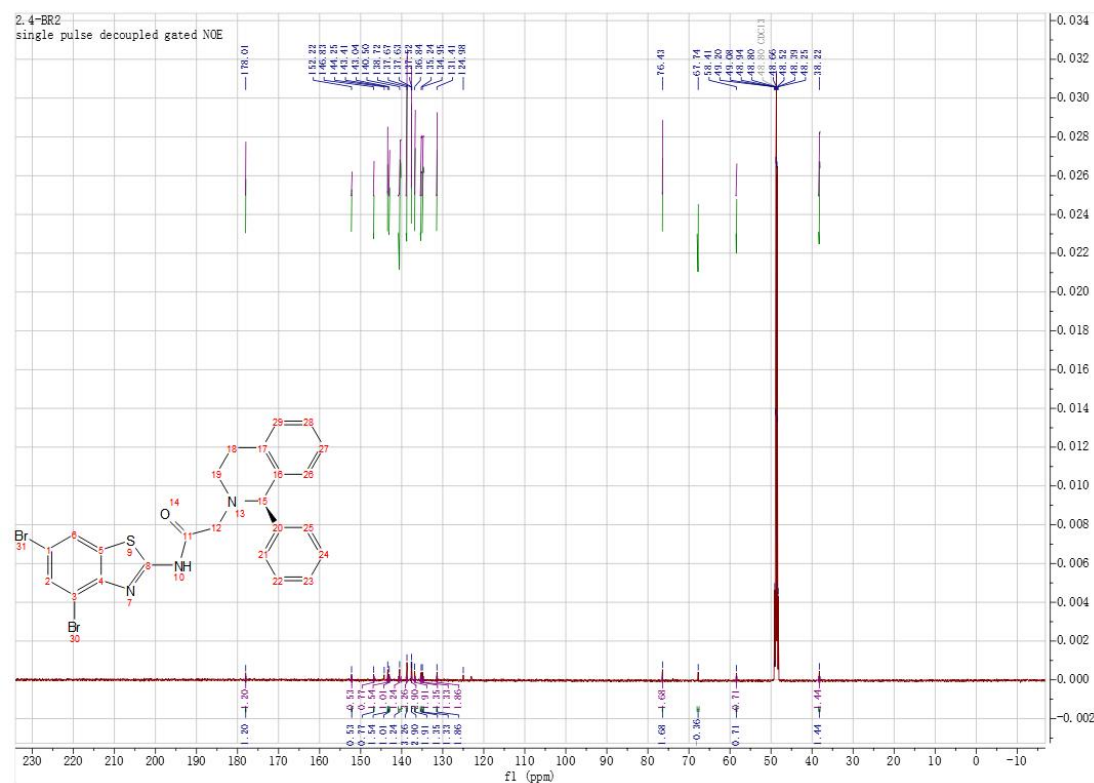

Figure S49. The  $^1\text{H}$  NMR data of 4p
